# Supplementary material
Source: PubMed Central journal article supplement (PMC8255996)
Supplement: pnas.2015572118.sapp.pdf [file pnas.2015572118.sapp.pdf]

1

## 2 **Supplementary Information for**

### 3 **The Origin of Cooperation**

4 **Nihal Koduri and Andrew W. Lo**

5 **Nihal Koduri.**

6 **E-mail: [nihal.koduri@sloan.mit.edu](mailto:nihal.koduri@sloan.mit.edu)**

#### 7 **This PDF file includes:**

8     Supplementary text

9     Figs. S1 to S2

10    Tables S1 to S8

## 11 Supporting Information Text

12 In this SI Appendix, we provide proofs for the main results of the paper and some additional theoretical and computational  
13 results.

## 14 Evolutionary Optimality

15 We use the growth rate results Theorems 1 and 2 from the main paper to characterize an evolutionarily optimal random  
16 offspring vector. That is, we find under what conditions and in what sense  $P_{A,T} + P_{B,T}$  under one random offspring vector  
17 dominates  $P_{A,T} + P_{B,T}$  under another. To formalize this, we introduce two sets of types with different random offspring vectors.

18 Let our two sets of types be  $(A, B)$  and  $(\bar{A}, \bar{B})$ . The first set has random offspring vector  $(x_{A,t}, x_{B,t})$  at time  $t$ , and the  
19 second set has random offspring vector  $(\bar{x}_{A,t}, \bar{x}_{B,t})$  at time  $t$ . We assume that  $(x_{A,t}, x_{B,t})$  is IID across  $t$  and that  $(\bar{x}_{A,t}, \bar{x}_{B,t})$   
20 is IID across  $t$ . We don't assume anything about the joint distribution of  $(x_{A,t}, x_{B,t})$  and  $(\bar{x}_{A,t}, \bar{x}_{B,t})$ . In particular,  $(x_{A,t}, x_{B,t})$   
21 and  $(\bar{x}_{A,t}, \bar{x}_{B,t})$  can be correlated.

22 We assume additionally that all first and second moments exist of  $(x_{A,t}, x_{B,t})$  and  $(\bar{x}_{A,t}, \bar{x}_{B,t})$ , and are denoted as follows.

$$\begin{aligned} \mathbb{E}[\log x_{A,t}] &= \mu_A & \mathbb{E}[\log \bar{x}_{A,t}] &= \bar{\mu}_A \\ \mathbb{E}[\log x_{B,t}] &= \mu_B & \mathbb{E}[\log \bar{x}_{B,t}] &= \bar{\mu}_B \\ \text{Var}(\log x_{A,t}) &= (\sigma_A)^2 & \text{Var}(\log \bar{x}_{A,t}) &= (\bar{\sigma}_A)^2 \\ \text{Var}(\log x_{B,t}) &= (\sigma_B)^2 & \text{Var}(\log \bar{x}_{B,t}) &= (\bar{\sigma}_B)^2 \\ \text{Corr}(\log x_{A,t}, \log x_{B,t}) &= \rho & \text{Corr}(\log \bar{x}_{A,t}, \log \bar{x}_{B,t}) &= \bar{\rho} \end{aligned}$$

24 The population sizes at generation  $T$  are

$$\begin{aligned} P_{A,T} &= \prod_{t=1}^T x_{A,t} & \bar{P}_{A,T} &= \prod_{t=1}^T \bar{x}_{A,t} \\ P_{B,T} &= \prod_{t=1}^T x_{B,t} & \bar{P}_{B,T} &= \prod_{t=1}^T \bar{x}_{B,t} \end{aligned}$$

26 For the sake of simplicity, let us introduce names for our random offspring vectors.  $V := (x_A, x_B)$  and  $\bar{V} := (\bar{x}_A, \bar{x}_B)$ . Our  
27 first result says that the total population grows exponentially faster under  $V$  than under  $\bar{V}$  if  $\max(\mu_A, \mu_B) > \max(\bar{\mu}_A, \bar{\mu}_B)$ .

28 **Proposition 1.** *Suppose  $\max(\mu_A, \mu_B) > \max(\bar{\mu}_A, \bar{\mu}_B)$ . Then, almost surely,*

$$\lim_{T \rightarrow \infty} \frac{\log((P_{A,T} + P_{B,T})/(\bar{P}_{A,T} + \bar{P}_{B,T}))}{T} = \max(\mu_A, \mu_B) - \max(\bar{\mu}_A, \bar{\mu}_B).$$

30 This means that if  $\max(\mu_A, \mu_B) > \max(\bar{\mu}_A, \bar{\mu}_B)$ , then  $(P_{A,T} + P_{B,T})/(\bar{P}_{A,T} + \bar{P}_{B,T})$  grows like  $e^{\gamma T}$  for some  $\gamma > 0$ . So  
31 regardless of any other aspects of the distributions, if  $\max(\mu_A, \mu_B) > \max(\bar{\mu}_A, \bar{\mu}_B)$ , the ratio of the populations of the two  
32 sets grows exponentially fast. So the evolutionarily optimal random offspring vector is one that maximizes  $\mu$  for each type  
33 separately.

34 But now suppose we restrict ourselves to random offspring vectors that do maximize  $\mu$  for each type separately. The next  
35 result characterizes the evolutionarily optimal vector among this set.

36 **Proposition 2.** *Suppose  $\mu_A = \mu_B = \bar{\mu}_A = \bar{\mu}_B = \mu$ . Let  $(N_A, N_B)$  be normally distributed with means 0, variances  
37  $(\sigma_A)^2$  and  $(\sigma_B)^2$ , respectively, and correlation  $\rho$ . Let  $(\bar{N}_A, \bar{N}_B)$  be normally distributed with means 0, variances  $(\bar{\sigma}_A)^2$  and  $(\bar{\sigma}_B)^2$ ,  
38 respectively, and correlation  $\bar{\rho}$ . Suppose  $\mathbb{E}[\max(N_A, N_B)] > \mathbb{E}[\max(\bar{N}_A, \bar{N}_B)]$ . Then*

$$\liminf_{T \rightarrow \infty} \frac{\log(\mathbb{E}[(P_{A,T} + P_{B,T})/(\bar{P}_{A,T} + \bar{P}_{B,T})])}{\sqrt{T}} \geq \mathbb{E}[\max(N_A, N_B)] - \mathbb{E}[\max(\bar{N}_A, \bar{N}_B)].$$

40 So among the behaviors that achieve the highest possible  $\mu$ , no matter the other aspects of the distributions, if  
41  $\mathbb{E}[\max(N_A, N_B)] > \mathbb{E}[\max(\bar{N}_A, \bar{N}_B)]$ , then  $P_{A,T} + P_{B,T}$  grows exponentially faster under  $V$  than under  $\bar{V}$ . Note that  
42 the correlations  $\rho$  and  $\bar{\rho}$  affect  $\mathbb{E}[\max(N_A, N_B)]$  and  $\mathbb{E}[\max(\bar{N}_A, \bar{N}_B)]$ . In fact, the correlations are the only thing that matters  
43 if we fix the variances. Thus, we next specialize our result to correlation.

44 **Corollary 1.** *Suppose  $\mu_A = \mu_B = \bar{\mu}_A = \bar{\mu}_B = \mu$  and  $\sigma_A = \sigma_B = \bar{\sigma}_A = \bar{\sigma}_B = \sigma$ . Suppose  $\rho < \bar{\rho}$ . Then*

$$\liminf_{T \rightarrow \infty} \frac{\log(\mathbb{E}[(P_{A,T} + P_{B,T})/(\bar{P}_{A,T} + \bar{P}_{B,T})])}{\sqrt{T}} \geq \frac{1}{\sqrt{\pi}} \left( \sqrt{1 - \rho} - \sqrt{1 - \bar{\rho}} \right).$$

46 We come to our most interesting result. If  $\rho < \bar{\rho}$ , then  $\mathbb{E}[(P_{A,T} + P_{B,T})/(\bar{P}_{A,T} + \bar{P}_{B,T})]$  grows like  $e^{\gamma\sqrt{T}}$  for some  $\gamma > 0$ . In  
47 other words, decreases in correlation cause exponential increases in population size.

## Behavioral Implications: Coordination

Assume that both types each have two possible actions, labeled 0 and 1. The variable  $x_{j,i}$  is the random offspring of type  $j$  choosing action  $i$ , for  $j = A, B$  and  $i = 0, 1$ . In general, the random offspring of type  $A$  can be written

$$x_A = (x_{A,0})^{1-I_A} (x_{A,1})^{I_A}$$

and the random offspring of type  $B$  can be written

$$x_B = (x_{B,0})^{1-I_B} (x_{B,1})^{I_B} .$$

where the indicator functions  $I_j$  denote the action of type  $j$ ,  $j = A, B$ .

We assume that the  $x_{j,i}$ 's and  $I_j$ 's are both random but also assume that the  $x_{j,i}$ 's are independent of the  $I_j$ 's. The assumption of independence in this case implies that the individuals' choice of action is independent of the consequence of the action, which has the interpretation that the individuals have no intelligence. Denote the means, variances, and covariances of the actions  $x$  by:

$$\mu_{j,i} \equiv \mathbb{E}[\log x_{j,i}] \quad , \quad (\sigma_{j,i})^2 \equiv \text{Var}(\log x_{j,i}) \quad , \quad \varsigma_{ii'} \equiv \text{Cov}[\log x_{A,i}, \log x_{B,i'}] \quad [1]$$

Observe the distinction between (for example)  $\mu_A$  as defined in the main paper and  $\mu_{A,0}$  and  $\mu_{A,1}$ ;  $\mu_A$  is a function of  $\mu_{A,0}$ ,  $\mu_{A,1}$  and  $I_A$ . Assume that

$$\mu_{A,0} = \mu_{A,1} = \mu_{B,0} = \mu_{B,1} \equiv \mu . \quad [2]$$

so that no action dominates on the basis of  $\mu$ .

Note that the choice of  $I_A$  and  $I_B$  completely determines the random offspring vector  $(x_A, x_B)$ . We now apply Theorem 1 and 2 from the paper (or more precisely, Propositions 1 and 2 from the SI) to characterize the evolutionarily optimal behaviors  $I_A$  and  $I_B$ . By design,  $\max(\mu_A, \mu_B)$  is the same for any  $I_A$  and  $I_B$ . So the evolutionarily optimal  $I_A$  and  $I_B$  will be a maximizer of  $\mathbb{E}[\max(N_A, N_B)]$ .

We can compute

$$\mathbb{E}[\max(N_A, N_B)] = \mu + \frac{1}{\sqrt{2\pi}} \sqrt{\sum_{i,i' \in \{0,1\}} p_{ii'} ((\sigma_{A,i})^2 + (\sigma_{B,i'})^2 - 2\varsigma_{ii'})}$$

where  $p_{ii'}$  is the probability that  $I_A = i$  and  $I_B = i'$  are jointly chosen. Thus the evolutionarily optimal  $I_A$  and  $I_B$  will have all of their probability mass on combinations  $(I_A = i, I_B = i')$  that maximize  $((\sigma_{A,i})^2 + (\sigma_{B,i'})^2 - 2\varsigma_{ii'})$ . In other words, even if there is uncertainty in  $I_A$  and  $I_B$  marginally, jointly their probabilities are certain.

For example, suppose that  $\sigma_{A,0} = \sigma_{A,1} = \sigma_{B,0} = \sigma_{B,1}$  and  $\varsigma_{00} = \varsigma_{11} > \varsigma_{01}$ . Then  $(i = 1, i' = 1)$  and  $(i = 0, i' = 0)$  would both maximize  $((\sigma_{A,i})^2 + (\sigma_{B,i'})^2 - 2\varsigma_{ii'})$ . So at an evolutionarily optimal  $I_A$  and  $I_B$ ,  $I_A$  could be uncertain, meaning type  $A$  individuals picked action 0 some of the time and 1 some of the time, and  $I_B$  could be uncertain, meaning type  $B$  individuals picked action 0 some of the time and 1 some of the time. However, at any evolutionarily optimal  $I_A$  and  $I_B$ , type  $A$  individuals would only pick 0 when type  $B$  individuals picked 0, and type  $A$  individuals would only pick 1 when type  $B$  individuals picked 1. This is coordination.

## Additional Simulation Results

In all simulations in the paper and the SI Appendix, we compute expectations as an average over 10,000 samples. We generate paths of stochastic processes using the Euler Method with a time increment of 0.001. All populations start with  $P_{A,0} = 1$  and  $P_{B,0} = 1$ .

**A. Additional Simulation Results for Basic Model.** Table S1 is a reproduction of Table 1 from the paper with a larger range of  $\mu$  values. The trends mentioned in the paper are consistent over this larger range as well. Notably, decreasing  $\rho$  from 0.5 to  $-0.5$  is similar to increasing  $\mu$  by 0.09. Table S2 halves  $\sigma$ , the standard deviation of log offspring. Table S3 doubles  $\sigma$ . It is no surprise that increasing  $\sigma$  increases the importance of  $\rho$  relative to  $\mu$ , since  $\sigma$  controls how much variation there is to be correlated.

**B. Additional Simulation Results for Model with Idiosyncratic Risk.** In this section, we fix systematic risk at its level in Table 1 (or Table S1) and add a component of idiosyncratic risk. In Table S4 we add a deterministic component of  $e^{-1}$  to each individual's offspring. In Table S5, we add a deterministic component of  $e^0$  to each individual's offspring. In Table S6, we add a random component to each individual's offspring that is lognormally distributed with  $\mu_{\text{id}} = -1$  and  $\sigma_{\text{id}} = \sqrt{2}$ . The mean of such a lognormally distributed component is 1, so the results in Table S6 should be very similar to the results in Table S5. What we find in general from this experiment is that idiosyncratic risk, even large amounts, decreases the importance of  $\rho$  relative to  $\mu$ , but only by a small amount. For example, to go from Table 1 (or Table S1) to Table S5 or S6, we add enough idiosyncratic risk to increase finite-time growth rate by over 100 percentage points. Yet decreasing  $\rho$  from 0.5 to  $-0.5$  is still comparable to increasing  $\mu$  by 0.07, as opposed to 0.09 originally.

Table S1. Simulated population growth rate

| $\rho \backslash \mu$ | -0.9   | -0.8   | -0.7   | -0.6   | -0.5   | -0.4   | -0.3   | -0.2   | -0.1   | 0.0    | 0.1    | 0.2    | 0.3    | 0.4    | 0.5    | 0.6    | 0.7    | 0.8    | 0.9    |
|-----------------------|--------|--------|--------|--------|--------|--------|--------|--------|--------|--------|--------|--------|--------|--------|--------|--------|--------|--------|--------|
| 0.00                  | 20.3%  | 20.0%  | 19.1%  | 18.6%  | 17.4%  | 16.2%  | 15.8%  | 15.0%  | 14.1%  | 13.0%  | 12.1%  | 11.2%  | 10.3%  | 9.0%   | 7.8%   | 7.0%   | 4.9%   | 4.3%   | 1.7%   |
| 0.02                  | 22.9%  | 22.6%  | 21.6%  | 21.0%  | 19.9%  | 18.9%  | 18.1%  | 17.7%  | 16.3%  | 15.6%  | 14.3%  | 13.6%  | 12.5%  | 11.2%  | 9.9%   | 8.6%   | 7.4%   | 6.2%   | 4.8%   |
| 0.04                  | 25.2%  | 24.7%  | 24.1%  | 23.0%  | 22.0%  | 21.5%  | 20.5%  | 19.6%  | 18.4%  | 18.2%  | 17.1%  | 15.7%  | 14.3%  | 13.8%  | 12.8%  | 10.8%  | 10.1%  | 7.8%   | 6.3%   |
| 0.06                  | 28.2%  | 27.0%  | 26.3%  | 25.8%  | 24.7%  | 24.3%  | 22.9%  | 22.0%  | 20.8%  | 20.4%  | 19.0%  | 17.7%  | 16.5%  | 16.1%  | 14.4%  | 13.4%  | 11.7%  | 10.0%  | 8.5%   |
| 0.08                  | 30.4%  | 29.7%  | 29.1%  | 28.1%  | 27.5%  | 27.1%  | 25.6%  | 23.9%  | 23.9%  | 22.5%  | 21.3%  | 20.5%  | 19.4%  | 18.6%  | 16.8%  | 14.8%  | 14.4%  | 12.8%  | 11.0%  |
| 0.10                  | 33.4%  | 32.5%  | 31.0%  | 30.2%  | 29.7%  | 28.9%  | 27.4%  | 26.2%  | 25.9%  | 24.5%  | 23.4%  | 23.4%  | 21.4%  | 20.6%  | 19.2%  | 17.8%  | 16.0%  | 14.7%  | 12.8%  |
| 0.12                  | 36.0%  | 34.9%  | 34.1%  | 33.7%  | 32.5%  | 31.5%  | 30.3%  | 30.1%  | 28.4%  | 27.6%  | 26.4%  | 25.9%  | 24.0%  | 23.3%  | 21.8%  | 20.3%  | 19.4%  | 17.3%  | 15.1%  |
| 0.14                  | 38.8%  | 37.7%  | 36.7%  | 35.6%  | 34.7%  | 33.7%  | 33.4%  | 31.7%  | 31.1%  | 30.4%  | 28.6%  | 27.3%  | 27.0%  | 25.1%  | 23.9%  | 23.5%  | 21.0%  | 18.9%  | 17.0%  |
| 0.16                  | 41.6%  | 40.9%  | 40.0%  | 39.0%  | 37.8%  | 37.1%  | 35.9%  | 34.7%  | 33.8%  | 32.4%  | 31.5%  | 30.1%  | 28.5%  | 27.8%  | 26.2%  | 25.2%  | 23.3%  | 22.1%  | 20.1%  |
| 0.18                  | 44.3%  | 43.1%  | 42.4%  | 41.4%  | 40.7%  | 39.5%  | 38.9%  | 37.7%  | 36.2%  | 35.5%  | 34.5%  | 32.6%  | 31.9%  | 30.7%  | 28.8%  | 27.2%  | 25.9%  | 24.7%  | 22.2%  |
| 0.20                  | 47.3%  | 46.4%  | 45.6%  | 44.3%  | 43.6%  | 43.0%  | 42.1%  | 40.6%  | 39.2%  | 37.6%  | 37.4%  | 36.3%  | 34.5%  | 33.3%  | 31.9%  | 30.8%  | 28.2%  | 26.9%  | 25.3%  |
| 0.22                  | 50.1%  | 49.8%  | 48.6%  | 46.9%  | 46.3%  | 45.2%  | 44.1%  | 42.9%  | 42.2%  | 41.3%  | 40.1%  | 38.6%  | 37.4%  | 35.8%  | 34.7%  | 32.9%  | 31.1%  | 28.7%  | 27.3%  |
| 0.24                  | 53.2%  | 52.8%  | 51.0%  | 50.0%  | 49.2%  | 47.9%  | 47.4%  | 45.7%  | 44.8%  | 43.0%  | 43.4%  | 41.1%  | 40.0%  | 39.5%  | 37.3%  | 35.4%  | 33.5%  | 31.9%  | 29.8%  |
| 0.26                  | 56.1%  | 55.5%  | 54.0%  | 53.8%  | 52.1%  | 50.5%  | 50.3%  | 48.7%  | 47.8%  | 47.2%  | 45.1%  | 43.6%  | 42.1%  | 41.8%  | 39.8%  | 38.4%  | 36.5%  | 34.8%  | 32.8%  |
| 0.28                  | 60.0%  | 58.6%  | 57.4%  | 56.3%  | 55.4%  | 53.9%  | 53.5%  | 52.3%  | 51.7%  | 50.1%  | 47.9%  | 47.3%  | 45.7%  | 43.6%  | 42.8%  | 41.1%  | 39.2%  | 37.0%  | 35.0%  |
| 0.30                  | 62.6%  | 61.3%  | 60.8%  | 59.5%  | 58.4%  | 57.3%  | 56.2%  | 55.0%  | 53.9%  | 52.8%  | 51.0%  | 50.1%  | 48.6%  | 47.5%  | 45.8%  | 44.1%  | 42.2%  | 40.6%  | 37.5%  |
| 0.32                  | 66.4%  | 65.2%  | 64.3%  | 63.0%  | 62.1%  | 60.6%  | 59.8%  | 58.2%  | 56.9%  | 55.9%  | 54.4%  | 53.2%  | 51.1%  | 49.9%  | 48.9%  | 46.5%  | 44.8%  | 43.3%  | 41.0%  |
| 0.34                  | 69.1%  | 68.2%  | 67.5%  | 66.2%  | 65.3%  | 64.3%  | 62.1%  | 60.9%  | 60.6%  | 58.6%  | 57.3%  | 56.3%  | 54.7%  | 53.6%  | 50.8%  | 49.5%  | 47.7%  | 45.8%  | 43.5%  |
| 0.36                  | 72.4%  | 71.1%  | 71.3%  | 69.6%  | 68.8%  | 67.4%  | 65.6%  | 64.0%  | 63.1%  | 62.4%  | 61.0%  | 59.3%  | 58.3%  | 56.1%  | 54.9%  | 52.8%  | 50.6%  | 49.2%  | 47.1%  |
| 0.38                  | 75.9%  | 75.5%  | 73.9%  | 72.6%  | 71.6%  | 71.0%  | 69.4%  | 68.6%  | 66.8%  | 65.4%  | 63.6%  | 62.6%  | 60.6%  | 59.7%  | 57.6%  | 55.7%  | 53.8%  | 51.0%  | 49.3%  |
| 0.40                  | 79.8%  | 79.4%  | 77.2%  | 76.1%  | 75.1%  | 74.0%  | 72.9%  | 72.0%  | 69.7%  | 68.1%  | 67.0%  | 65.4%  | 63.9%  | 62.8%  | 62.2%  | 59.4%  | 57.0%  | 53.9%  | 52.3%  |
| 0.42                  | 83.6%  | 82.1%  | 81.7%  | 80.4%  | 78.5%  | 77.6%  | 76.4%  | 75.0%  | 73.8%  | 72.6%  | 69.8%  | 69.4%  | 67.9%  | 66.0%  | 63.9%  | 62.3%  | 60.6%  | 57.4%  | 55.9%  |
| 0.44                  | 87.8%  | 86.1%  | 85.7%  | 84.0%  | 82.5%  | 81.1%  | 79.8%  | 77.9%  | 76.2%  | 75.3%  | 73.9%  | 72.0%  | 71.5%  | 68.6%  | 67.4%  | 65.7%  | 63.1%  | 61.0%  | 58.6%  |
| 0.46                  | 90.7%  | 90.0%  | 89.0%  | 87.3%  | 85.9%  | 85.0%  | 82.6%  | 81.6%  | 81.0%  | 78.7%  | 76.9%  | 76.0%  | 73.9%  | 72.8%  | 71.4%  | 67.2%  | 66.9%  | 64.6%  | 61.3%  |
| 0.48                  | 94.5%  | 93.6%  | 92.5%  | 90.8%  | 89.1%  | 88.8%  | 87.2%  | 86.1%  | 84.6%  | 82.1%  | 80.8%  | 79.7%  | 77.9%  | 76.8%  | 74.4%  | 72.7%  | 70.1%  | 67.3%  | 65.3%  |
| 0.50                  | 98.5%  | 97.2%  | 96.1%  | 94.4%  | 94.0%  | 91.7%  | 90.0%  | 90.1%  | 87.2%  | 86.9%  | 85.5%  | 82.6%  | 81.5%  | 79.2%  | 78.0%  | 75.8%  | 74.1%  | 70.9%  | 68.7%  |
| 0.52                  | 103.4% | 101.2% | 100.1% | 99.6%  | 97.7%  | 95.1%  | 93.4%  | 92.2%  | 90.3%  | 88.4%  | 86.7%  | 85.4%  | 83.6%  | 80.5%  | 79.4%  | 77.1%  | 75.1%  | 72.1%  | 71.2%  |
| 0.54                  | 106.7% | 106.0% | 104.4% | 103.4% | 101.7% | 101.1% | 99.2%  | 96.6%  | 95.5%  | 94.1%  | 93.0%  | 90.1%  | 89.6%  | 87.1%  | 84.9%  | 83.1%  | 80.9%  | 77.3%  | 75.8%  |
| 0.56                  | 110.9% | 109.9% | 108.2% | 107.1% | 105.0% | 103.9% | 103.4% | 100.8% | 99.9%  | 97.6%  | 95.8%  | 94.9%  | 92.9%  | 90.2%  | 88.8%  | 87.1%  | 84.9%  | 80.4%  | 78.4%  |
| 0.58                  | 116.2% | 113.9% | 112.3% | 111.2% | 110.6% | 108.2% | 107.5% | 105.7% | 103.5% | 101.6% | 100.2% | 98.3%  | 96.8%  | 95.1%  | 92.7%  | 90.0%  | 88.2%  | 85.5%  | 82.0%  |
| 0.60                  | 120.5% | 118.2% | 117.1% | 115.7% | 113.7% | 112.6% | 111.5% | 108.7% | 107.7% | 105.9% | 104.2% | 102.4% | 100.9% | 98.3%  | 98.0%  | 94.3%  | 91.7%  | 90.0%  | 86.5%  |
| 0.62                  | 124.2% | 122.0% | 120.9% | 120.0% | 119.2% | 116.3% | 115.6% | 114.1% | 112.0% | 109.9% | 109.7% | 107.0% | 104.3% | 102.6% | 100.4% | 98.9%  | 96.1%  | 93.1%  | 90.0%  |
| 0.64                  | 128.3% | 127.3% | 126.1% | 124.2% | 123.0% | 120.7% | 119.2% | 117.8% | 116.6% | 114.4% | 112.3% | 111.4% | 108.3% | 106.6% | 103.7% | 101.9% | 100.7% | 98.6%  | 93.9%  |
| 0.66                  | 133.6% | 132.0% | 130.5% | 128.4% | 126.9% | 126.3% | 124.7% | 122.3% | 121.6% | 118.8% | 117.6% | 115.5% | 112.2% | 111.5% | 108.6% | 106.2% | 104.4% | 100.3% | 98.2%  |
| 0.68                  | 137.9% | 136.4% | 134.7% | 133.6% | 132.4% | 128.8% | 127.7% | 126.2% | 124.4% | 122.1% | 120.3% | 119.9% | 117.2% | 116.0% | 112.1% | 110.4% | 107.7% | 105.6% | 102.1% |
| 0.70                  | 143.8% | 141.1% | 139.9% | 137.8% | 137.4% | 134.8% | 133.3% | 131.8% | 129.1% | 127.1% | 126.0% | 123.4% | 122.3% | 120.4% | 117.1% | 114.1% | 112.4% | 109.6% | 106.5% |
| 0.72                  | 147.9% | 146.9% | 144.4% | 143.2% | 141.7% | 139.6% | 138.4% | 135.2% | 134.5% | 131.8% | 130.4% | 128.6% | 126.2% | 124.1% | 121.3% | 119.5% | 115.5% | 113.5% | 109.5% |
| 0.74                  | 152.4% | 151.5% | 149.9% | 147.5% | 146.9% | 144.1% | 142.6% | 141.3% | 139.5% | 136.9% | 134.8% | 132.6% | 130.2% | 127.5% | 126.5% | 123.4% | 120.5% | 118.5% | 113.9% |
| 0.76                  | 157.2% | 156.4% | 154.4% | 153.0% | 152.2% | 149.4% | 147.6% | 145.6% | 142.7% | 142.6% | 139.6% | 138.6% | 135.3% | 133.1% | 131.9% | 128.1% | 124.7% | 121.6% | 119.9% |
| 0.78                  | 164.5% | 161.8% | 159.8% | 158.3% | 156.4% | 153.5% | 153.7% | 150.1% | 148.7% | 148.0% | 144.8% | 143.1% | 140.2% | 138.2% | 135.7% | 131.5% | 129.8% | 125.8% | 123.2% |
| 0.80                  | 168.7% | 166.0% | 165.6% | 162.5% | 161.9% | 160.3% | 157.5% | 156.0% | 153.8% | 152.3% | 150.6% | 145.8% | 145.1% | 142.9% | 139.9% | 137.5% | 134.8% | 131.5% | 127.0% |
| 0.82                  | 172.9% | 172.5% | 169.9% | 168.3% | 166.9% | 164.5% | 162.9% | 160.7% | 159.1% | 156.8% | 154.4% | 152.6% | 149.8% | 146.8% | 145.5% | 142.2% | 138.4% | 135.8% | 132.3% |
| 0.84                  | 179.0% | 177.8% | 176.5% | 174.2% | 172.9% | 169.4% | 167.9% | 165.2% | 164.5% | 161.6% | 159.3% | 157.0% | 154.7% | 153.7% | 149.9% | 146.1% | 142.3% | 140.8% | 137.7% |
| 0.86                  | 185.5% | 183.1% | 181.6% | 180.0% | 177.3% | 175.4% | 173.0% | 170.4% | 170.3% | 166.8% | 164.8% | 162.8% | 159.8% | 156.7% | 153.6% | 150.9% | 149.1% | 144.6% | 140.4% |
| 0.88                  | 191.3% | 189.2% | 186.4% | 184.8% | 181.9% | 181.6% | 180.1% | 176.4% | 174.4% | 172.3% | 170.0% | 167.1% | 164.8% | 164.9% | 160.9% | 156.8% | 153.3% | 151.2% | 145.8% |
| 0.90                  | 196.7% | 194.3% | 192.3% | 190.5% | 187.6% | 186.2% | 185.5% | 182.8% | 181.9% | 179.4% | 175.4% | 173.7% | 170.5% | 168.1% | 165.1% | 163.2% | 158.6% | 155.1% | 150.2% |
| 0.92                  | 202.5% | 200.3% | 199.0% | 195.7% | 194.7% | 192.2% | 191.8% | 186.7% | 185.4% | 184.8% | 181.6% | 177.3% | 175.5% | 172.9% | 171.6% | 167.2% | 163.4% | 159.6% | 155.3% |
| 0.94                  | 208.8% | 207.2% | 204.8% | 203.0% | 200.0% | 198.8% | 196.9% | 193.6% | 192.0% | 188.3% | 186.9% | 183.9% | 183.0% | 179.4% | 175.3% | 171.8% | 170.3% | 164.2% | 161.5% |
| 0.96                  | 215.0% | 212.9% | 210.0% | 209.1% | 205.8% | 205.0% | 202.2% | 199.0% | 197.4% | 195.6% | 192.2% | 189.8% | 186.5% | 183.5% | 181.3% | 178.3% | 176.5% | 171.7% | 167.4% |
| 0.98                  | 222.6% | 219.8% | 216.4% | 214.6% | 213.1% | 210.6% | 207.8% | 206.6% | 203.6% | 203.0% | 198.4% | 197.5% | 193.6% | 191.2% | 187.0% | 184.8% | 180.2% | 176.2% | 171.4% |
| 1.00                  | 227.8% | 224.2% | 224.8% | 221.1% | 219.0% | 217.9% | 214.8% | 213.6% | 210.2% | 207.7% | 204.4% | 201.9% | 199.6% | 197.0% | 192.4% | 189.9% | 184.6% | 182.5% | 176.4% |

The number of offspring for both types follows a lognormal distribution with the stated  $\mu$  and  $\rho$ , and with  $\sigma = 1.0$ . Quantities shown represent population growth rate per generation after 10 generations, computed as  $e^{\mathbb{E}[\log(P_{10}/P_0)]/10}$ , where  $P_T = P_{A,T} + P_{B,T}$ .

97 **C. Additional Simulation Results for Model with Density Dependence.** We reproduce Tables 2-4 from the paper with  $r = 1.4$   
 98 in Table S7 and  $r = 1.5$  in S8 to match the range of  $\mu$  in Table S1. At first glance, it seems  $\rho$  plays a smaller role when  $r$  is  
 99 large. However, this is a bit of a red herring because all growth rates go to zero over time with density dependence, and  $\rho$  has  
 100 actually become much more important compared to  $r$ . To get the same effect as increasing  $r$  from 1.4 to 1.5, one needs only  
 101 decrease  $\rho$  from 0.5 to about 0.2 when  $K = 5$  or to about 0.0 when  $K = 80$ . As a reminder, to get the same effect as increasing  
 102  $r$  from 0.5 to 0.6, one needs to decrease  $\rho$  from 0.5 to  $-0.1$  when  $K = 5$  or 0.5 to  $-0.3$  when  $K = 80$ . Figures S1 and S2 show  
 103 the population growth over time when  $r = 1.5$  for  $K = 10$  and  $K = 40$  respectively. The impact of correlation is remarkably  
 104 consistent over time, even in populations whose growth has plateaued.

105 **Proofs**

**Lemma 1** (Log-Sum-Exp inequality).

106 
$$\max(x_1, \dots, x_m) \leq \log(\exp(x_1) + \dots + \exp(x_m)) \leq \max(x_1, \dots, x_m) + \log(m).$$

*Proof.* The left inequality is because

$$\max(x_1, \dots, x_m) = \log(\max(\exp(x_1), \dots, \exp(x_m))) \tag{3}$$

$$\leq \log(\exp(x_1) + \dots + \exp(x_m)) \tag{4}$$

107 The right inequality is because

108 
$$\exp(x_1) + \dots + \exp(x_m) \leq m \max(\exp(x_1), \dots, \exp(x_m)) \tag{5}$$

109 □

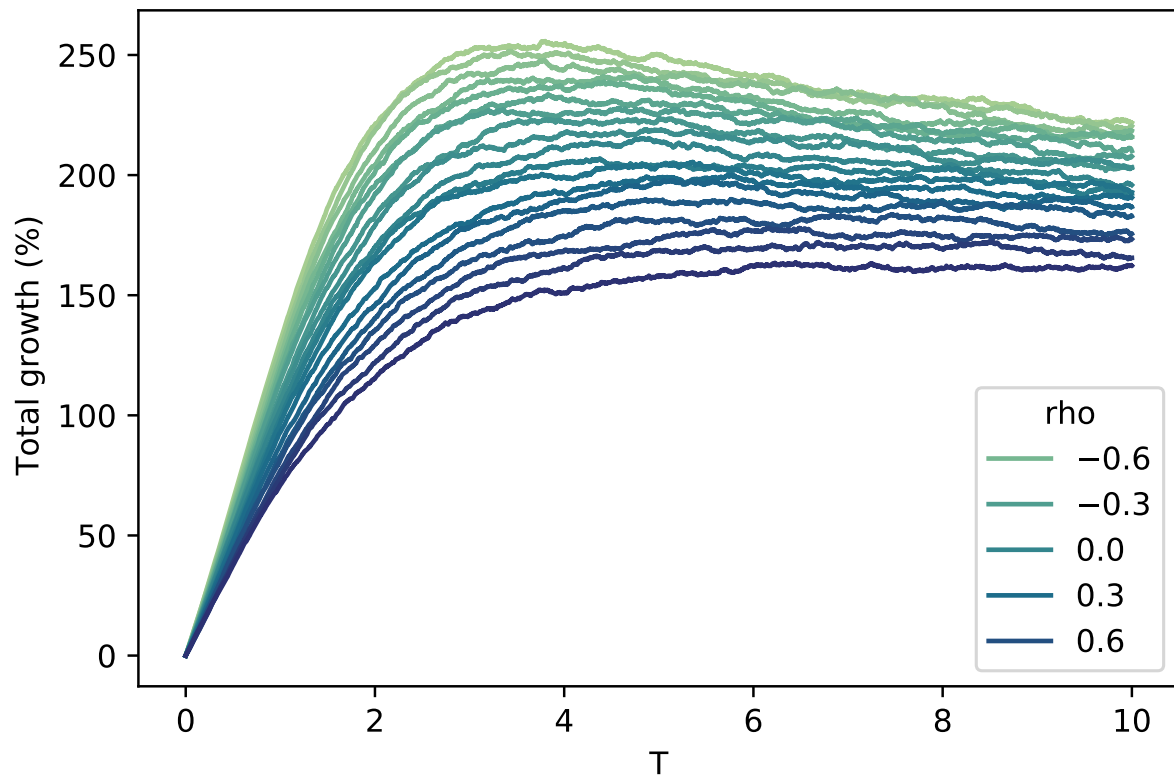

**Fig. S1.** Total density-dependent population growth vs. time ( $K = 10$ ). Values of  $\rho$  range from  $-0.9$  (lightest) to  $0.9$  (darkest). The number of offspring for both types follows Eq. (25) and Eq. (26) from the main article with  $r = 1.5$ ,  $K = 10$ ,  $L = 10$ , and  $s = 1.0$ .

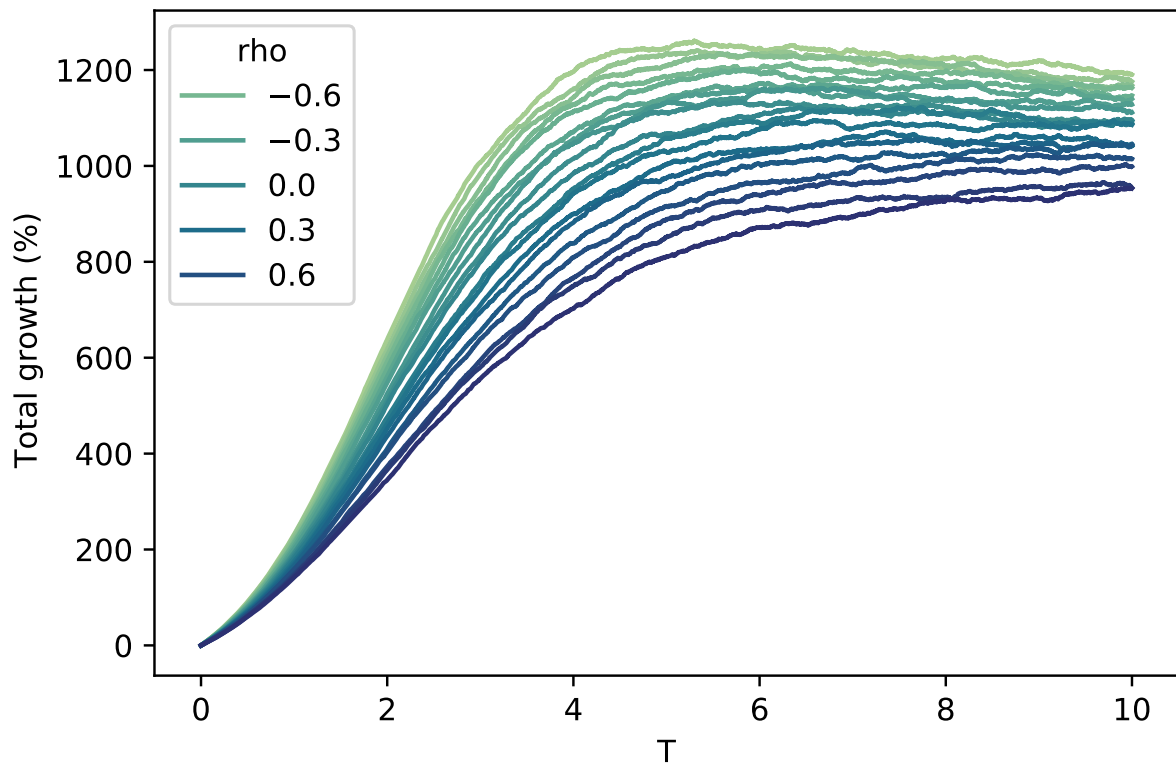

**Fig. S2.** Total density-dependent population growth vs. time ( $K = 40$ ). Values of  $\rho$  range from  $-0.9$  (lightest) to  $0.9$  (darkest). The number of offspring for both types follows Eq. (25) and Eq. (26) from the main article with  $r = 1.5$ ,  $K = 40$ ,  $L = 40$ , and  $s = 1.0$ .

Table S2. Simulated population growth rate ( $\sigma = 0.5$ )

| $\rho \backslash \mu$ | -0.9   | -0.8   | -0.7   | -0.6   | -0.5   | -0.4   | -0.3   | -0.2   | -0.1   | 0.0    | 0.1    | 0.2    | 0.3    | 0.4    | 0.5    | 0.6    | 0.7    | 0.8    | 0.9    |
|-----------------------|--------|--------|--------|--------|--------|--------|--------|--------|--------|--------|--------|--------|--------|--------|--------|--------|--------|--------|--------|
| 0.00                  | 7.7%   | 7.2%   | 6.8%   | 6.5%   | 6.4%   | 6.0%   | 5.8%   | 5.2%   | 5.1%   | 4.5%   | 4.2%   | 3.8%   | 3.5%   | 3.3%   | 2.4%   | 2.0%   | 1.7%   | 1.3%   | 0.9%   |
| 0.02                  | 9.8%   | 9.3%   | 9.1%   | 8.7%   | 8.5%   | 8.0%   | 7.8%   | 7.4%   | 7.2%   | 6.7%   | 6.2%   | 6.0%   | 5.3%   | 4.9%   | 4.5%   | 4.2%   | 3.7%   | 3.0%   | 2.7%   |
| 0.04                  | 11.9%  | 11.5%  | 11.2%  | 11.0%  | 10.6%  | 10.3%  | 9.9%   | 9.5%   | 9.1%   | 8.9%   | 8.3%   | 8.0%   | 7.7%   | 7.2%   | 6.7%   | 6.4%   | 5.9%   | 5.0%   | 4.7%   |
| 0.06                  | 14.3%  | 13.8%  | 13.4%  | 13.2%  | 12.9%  | 12.3%  | 12.2%  | 12.0%  | 11.4%  | 11.1%  | 10.6%  | 10.1%  | 9.9%   | 9.4%   | 8.9%   | 8.1%   | 8.1%   | 7.6%   | 6.9%   |
| 0.08                  | 16.4%  | 16.3%  | 15.8%  | 15.4%  | 15.0%  | 15.0%  | 14.4%  | 14.1%  | 13.6%  | 13.3%  | 12.9%  | 12.5%  | 12.1%  | 11.7%  | 11.2%  | 10.9%  | 10.1%  | 9.3%   | 9.1%   |
| 0.10                  | 19.1%  | 18.6%  | 18.3%  | 17.9%  | 17.5%  | 17.2%  | 16.8%  | 16.3%  | 16.1%  | 15.5%  | 15.0%  | 14.7%  | 14.2%  | 13.6%  | 13.0%  | 12.9%  | 12.6%  | 11.9%  | 11.4%  |
| 0.12                  | 21.4%  | 20.9%  | 20.6%  | 20.2%  | 20.1%  | 19.6%  | 19.1%  | 18.6%  | 18.4%  | 17.9%  | 17.2%  | 17.1%  | 16.5%  | 16.2%  | 15.4%  | 14.9%  | 14.7%  | 14.0%  | 13.1%  |
| 0.14                  | 24.0%  | 23.3%  | 22.8%  | 22.6%  | 22.1%  | 22.2%  | 21.3%  | 21.1%  | 20.7%  | 20.4%  | 19.9%  | 19.5%  | 19.0%  | 18.6%  | 17.7%  | 17.5%  | 17.1%  | 16.0%  | 15.9%  |
| 0.16                  | 26.2%  | 25.7%  | 25.6%  | 25.3%  | 24.9%  | 24.4%  | 23.9%  | 23.7%  | 23.1%  | 22.9%  | 22.5%  | 21.8%  | 21.1%  | 20.5%  | 20.5%  | 19.9%  | 19.2%  | 18.8%  | 18.0%  |
| 0.18                  | 28.7%  | 28.4%  | 28.0%  | 27.7%  | 27.1%  | 27.0%  | 26.4%  | 26.1%  | 25.6%  | 25.3%  | 24.5%  | 24.3%  | 23.9%  | 23.1%  | 22.9%  | 22.0%  | 21.8%  | 20.9%  | 20.4%  |
| 0.20                  | 31.4%  | 31.1%  | 30.9%  | 30.3%  | 30.1%  | 29.6%  | 29.5%  | 28.7%  | 27.9%  | 27.5%  | 27.4%  | 27.0%  | 26.4%  | 26.1%  | 25.3%  | 24.7%  | 24.3%  | 23.5%  | 22.8%  |
| 0.22                  | 33.8%  | 33.5%  | 33.2%  | 32.9%  | 32.5%  | 32.0%  | 31.5%  | 31.2%  | 31.0%  | 30.4%  | 29.8%  | 29.5%  | 29.0%  | 28.6%  | 27.6%  | 27.4%  | 26.7%  | 26.2%  | 25.2%  |
| 0.24                  | 36.8%  | 36.3%  | 35.6%  | 35.6%  | 35.2%  | 34.5%  | 34.1%  | 33.7%  | 33.6%  | 33.0%  | 32.3%  | 32.1%  | 31.6%  | 30.8%  | 30.6%  | 30.0%  | 29.3%  | 28.6%  | 27.7%  |
| 0.26                  | 39.7%  | 39.1%  | 38.5%  | 38.3%  | 38.1%  | 37.4%  | 37.0%  | 36.6%  | 36.3%  | 35.8%  | 35.5%  | 34.5%  | 33.9%  | 33.5%  | 33.0%  | 32.3%  | 32.0%  | 31.4%  | 30.4%  |
| 0.28                  | 42.4%  | 42.0%  | 41.4%  | 41.0%  | 40.7%  | 40.3%  | 39.8%  | 39.4%  | 38.9%  | 38.6%  | 37.8%  | 37.1%  | 36.7%  | 36.2%  | 35.8%  | 35.3%  | 34.6%  | 33.7%  | 33.0%  |
| 0.30                  | 45.2%  | 44.7%  | 44.4%  | 43.9%  | 43.8%  | 42.9%  | 42.7%  | 42.4%  | 41.5%  | 41.0%  | 40.5%  | 39.7%  | 39.6%  | 38.8%  | 38.4%  | 38.0%  | 37.1%  | 36.6%  | 36.0%  |
| 0.32                  | 48.0%  | 47.5%  | 47.2%  | 46.7%  | 46.4%  | 45.5%  | 45.2%  | 44.8%  | 44.8%  | 44.2%  | 43.7%  | 43.0%  | 42.4%  | 41.9%  | 40.9%  | 40.5%  | 39.5%  | 38.3%  | 38.3%  |
| 0.34                  | 51.0%  | 50.6%  | 50.4%  | 50.0%  | 49.1%  | 48.8%  | 48.2%  | 47.9%  | 47.6%  | 46.9%  | 46.6%  | 46.0%  | 45.3%  | 44.7%  | 44.2%  | 43.8%  | 42.9%  | 42.2%  | 41.1%  |
| 0.36                  | 54.3%  | 53.7%  | 53.4%  | 53.0%  | 52.4%  | 51.8%  | 51.5%  | 51.3%  | 50.3%  | 50.3%  | 49.2%  | 48.8%  | 48.2%  | 47.8%  | 46.9%  | 46.1%  | 45.8%  | 45.4%  | 44.3%  |
| 0.38                  | 57.2%  | 56.9%  | 56.4%  | 56.0%  | 55.5%  | 54.6%  | 54.3%  | 54.0%  | 53.3%  | 53.1%  | 52.5%  | 51.5%  | 51.4%  | 50.7%  | 50.3%  | 49.5%  | 48.9%  | 47.8%  | 47.1%  |
| 0.40                  | 60.4%  | 60.0%  | 59.7%  | 59.1%  | 58.6%  | 58.2%  | 57.3%  | 57.1%  | 56.3%  | 56.1%  | 55.4%  | 54.9%  | 54.1%  | 53.8%  | 53.2%  | 52.3%  | 51.9%  | 50.9%  | 50.5%  |
| 0.42                  | 63.9%  | 63.3%  | 62.5%  | 62.5%  | 61.6%  | 61.5%  | 60.7%  | 60.4%  | 59.5%  | 59.1%  | 58.5%  | 58.3%  | 57.7%  | 56.7%  | 56.1%  | 55.5%  | 54.4%  | 54.0%  | 53.3%  |
| 0.44                  | 66.9%  | 66.5%  | 65.8%  | 65.4%  | 64.8%  | 64.7%  | 63.9%  | 63.6%  | 62.9%  | 62.0%  | 61.8%  | 61.3%  | 60.8%  | 59.9%  | 59.2%  | 58.6%  | 57.7%  | 57.0%  | 56.3%  |
| 0.46                  | 70.6%  | 70.0%  | 69.9%  | 68.9%  | 68.6%  | 68.1%  | 67.3%  | 66.6%  | 66.3%  | 65.6%  | 65.0%  | 64.5%  | 63.9%  | 63.0%  | 62.4%  | 61.7%  | 60.6%  | 60.5%  | 59.0%  |
| 0.48                  | 73.9%  | 73.3%  | 73.0%  | 72.4%  | 71.8%  | 71.5%  | 70.8%  | 70.0%  | 69.6%  | 69.1%  | 68.6%  | 67.6%  | 67.1%  | 66.4%  | 65.9%  | 64.9%  | 64.3%  | 63.2%  | 62.3%  |
| 0.50                  | 77.6%  | 76.9%  | 76.1%  | 75.8%  | 75.0%  | 74.8%  | 73.9%  | 73.7%  | 73.2%  | 72.2%  | 71.8%  | 71.4%  | 70.4%  | 69.5%  | 69.2%  | 68.3%  | 68.0%  | 66.2%  | 66.0%  |
| 0.52                  | 80.8%  | 80.3%  | 80.0%  | 79.4%  | 78.5%  | 78.3%  | 78.1%  | 77.2%  | 76.8%  | 76.2%  | 75.3%  | 74.8%  | 74.0%  | 73.1%  | 72.9%  | 72.1%  | 71.0%  | 70.2%  | 68.7%  |
| 0.54                  | 84.8%  | 84.1%  | 83.7%  | 82.9%  | 82.4%  | 82.1%  | 81.0%  | 80.7%  | 80.2%  | 79.2%  | 78.8%  | 78.2%  | 77.3%  | 76.4%  | 76.4%  | 75.2%  | 74.4%  | 73.5%  | 73.3%  |
| 0.56                  | 88.4%  | 87.8%  | 87.3%  | 86.8%  | 86.0%  | 85.5%  | 84.7%  | 84.6%  | 83.6%  | 82.8%  | 82.5%  | 81.8%  | 81.2%  | 80.1%  | 79.5%  | 79.1%  | 77.6%  | 77.3%  | 76.3%  |
| 0.58                  | 92.0%  | 91.7%  | 91.0%  | 90.4%  | 90.0%  | 89.4%  | 88.7%  | 88.2%  | 87.4%  | 86.8%  | 85.7%  | 85.2%  | 84.2%  | 83.8%  | 83.0%  | 82.3%  | 81.9%  | 80.7%  | 79.4%  |
| 0.60                  | 96.1%  | 95.2%  | 94.9%  | 94.4%  | 93.9%  | 93.3%  | 92.5%  | 91.7%  | 91.2%  | 90.6%  | 89.7%  | 88.8%  | 88.5%  | 87.7%  | 87.1%  | 86.2%  | 85.0%  | 84.6%  | 83.3%  |
| 0.62                  | 99.8%  | 99.6%  | 99.1%  | 98.3%  | 97.7%  | 96.8%  | 96.5%  | 95.7%  | 95.3%  | 94.8%  | 93.8%  | 92.7%  | 92.3%  | 91.7%  | 90.9%  | 90.1%  | 88.8%  | 88.1%  | 86.3%  |
| 0.64                  | 103.9% | 103.5% | 102.6% | 102.1% | 101.7% | 101.2% | 100.3% | 99.6%  | 99.4%  | 98.0%  | 97.2%  | 96.7%  | 95.9%  | 95.2%  | 94.5%  | 93.7%  | 92.6%  | 92.1%  | 91.3%  |
| 0.66                  | 107.8% | 107.5% | 107.2% | 106.0% | 105.4% | 105.0% | 104.4% | 103.7% | 102.7% | 102.3% | 101.4% | 101.1% | 100.0% | 99.1%  | 98.3%  | 97.6%  | 96.6%  | 95.8%  | 94.9%  |
| 0.68                  | 112.5% | 111.7% | 111.6% | 110.3% | 110.0% | 109.2% | 108.2% | 108.1% | 106.7% | 106.3% | 105.9% | 105.1% | 103.8% | 103.1% | 102.4% | 101.8% | 100.7% | 100.1% | 98.3%  |
| 0.70                  | 116.6% | 116.4% | 115.6% | 114.6% | 114.1% | 113.1% | 112.7% | 112.2% | 111.2% | 110.7% | 109.8% | 109.4% | 108.3% | 107.5% | 106.7% | 105.3% | 104.4% | 104.1% | 102.1% |
| 0.72                  | 120.8% | 120.3% | 119.7% | 118.9% | 118.3% | 118.1% | 117.1% | 116.3% | 115.5% | 114.8% | 114.0% | 113.5% | 112.7% | 111.9% | 110.7% | 109.9% | 108.6% | 107.7% | 106.2% |
| 0.74                  | 125.2% | 124.5% | 124.2% | 123.5% | 122.9% | 122.2% | 121.3% | 120.4% | 119.7% | 119.1% | 118.3% | 117.4% | 116.7% | 116.1% | 115.0% | 114.3% | 113.0% | 112.1% | 111.0% |
| 0.76                  | 129.9% | 129.6% | 129.0% | 127.7% | 127.8% | 126.5% | 125.7% | 125.5% | 124.1% | 123.5% | 122.4% | 122.3% | 121.4% | 120.5% | 119.3% | 118.1% | 117.8% | 115.5% | 115.1% |
| 0.78                  | 134.5% | 133.8% | 133.2% | 132.6% | 132.1% | 131.2% | 130.3% | 129.7% | 128.8% | 128.5% | 127.1% | 126.4% | 125.6% | 124.5% | 123.9% | 122.4% | 122.4% | 120.6% | 119.1% |
| 0.80                  | 139.5% | 138.7% | 138.2% | 137.4% | 136.8% | 136.3% | 135.0% | 134.5% | 134.0% | 132.8% | 131.5% | 131.0% | 130.3% | 129.3% | 128.8% | 127.4% | 126.4% | 125.7% | 123.6% |
| 0.82                  | 144.7% | 143.2% | 143.1% | 142.4% | 141.3% | 140.7% | 140.0% | 138.5% | 138.6% | 137.1% | 136.6% | 136.3% | 134.7% | 134.2% | 133.1% | 131.9% | 130.8% | 129.1% | 128.3% |
| 0.84                  | 149.2% | 148.2% | 147.7% | 146.9% | 145.7% | 145.2% | 144.8% | 144.0% | 142.7% | 142.4% | 141.3% | 140.4% | 140.2% | 138.7% | 137.4% | 136.2% | 135.5% | 134.6% | 133.2% |
| 0.86                  | 154.3% | 153.6% | 152.6% | 152.0% | 151.4% | 150.4% | 150.0% | 148.6% | 147.9% | 146.8% | 146.7% | 145.2% | 144.6% | 144.0% | 142.2% | 141.4% | 140.3% | 139.5% | 138.0% |
| 0.88                  | 159.5% | 158.5% | 158.3% | 157.8% | 156.4% | 155.4% | 154.4% | 153.6% | 153.4% | 152.2% | 151.1% | 150.0% | 149.9% | 148.7% | 147.1% | 146.6% | 144.8% | 143.7% | 142.5% |
| 0.90                  | 164.2% | 163.9% | 163.1% | 162.2% | 161.4% | 160.8% | 159.7% | 159.1% | 158.6% | 157.0% | 156.6% | 155.4% | 154.3% | 153.3% | 152.4% | 150.6% | 149.2% | 148.7% | 147.5% |
| 0.92                  | 170.0% | 168.9% | 168.5% | 167.2% | 167.2% | 165.6% | 165.4% | 164.1% | 163.0% | 162.6% | 161.4% | 160.7% | 160.1% | 158.4% | 157.2% | 156.5% | 154.9% | 154.3% | 152.4% |
| 0.94                  | 175.5% | 174.7% | 173.8% | 173.0% | 172.4% | 171.4% | 171.2% | 169.9% | 168.9% | 167.5% | 167.0% | 165.5% | 164.7% | 163.4% | 162.3% | 161.3% | 160.1% | 158.8% | 157.4% |
| 0.96                  | 180.8% | 180.6% | 179.6% | 179.0% | 177.3% | 176.8% | 175.4% | 175.0% | 174.0% | 173.0% | 172.1% | 171.6% | 170.6% | 168.8% | 167.8% | 166.4% | 165.2% | 164.4% | 162.4% |
| 0.98                  | 186.8% | 186.2% | 184.7% | 183.9% | 183.1% | 182.1% | 181.7% | 180.2% | 179.8% | 178.6% | 177.6% | 176.4% | 175.1% | 174.0% | 173.3% | 171.7% | 170.2% | 170.3% | 168.0% |
| 1.00                  | 192.3% | 191.6% | 190.5% | 189.9% | 189.3% | 187.6% | 187.0% | 186.6% | 185.3% | 184.7% | 183.7% | 181.7% | 180.7% | 179.8% | 179.7% | 177.5% | 176.7% | 175.3% | 173.6% |

The number of offspring for both types follows a lognormal distribution with the stated  $\mu$  and  $\rho$ , and with  $\sigma = 0.5$ . Quantities shown represent population growth rate per generation after 10 generations, computed as  $e^{\mathbb{E}[\log(P_{10}/P_0)]/10}$ , where  $P_T = P_{A,T} + P_{B,T}$ .

*Proof of Theorem 1.*

$$\log(P_{A,T} + P_{B,T}) = \log \left( \exp \left( \sum_{t=1}^T \log x_{A,t} \right) + \exp \left( \sum_{t=1}^T \log x_{B,t} \right) \right). \quad [6]$$

Using Lemma 1 with  $m = 2$ ,

$$\max \left( \sum_{t=1}^T \log x_{A,t}, \sum_{t=1}^T \log x_{B,t} \right) \leq \log(P_{A,T} + P_{B,T}) \leq \max \left( \sum_{t=1}^T \log x_{A,t}, \sum_{t=1}^T \log x_{B,t} \right) + \log(2). \quad [7]$$

Dividing by  $T$  on all sides and using the strong law of large numbers, we have the desired result.  $\square$

*Proof of Theorem 2.* Again,

$$\log(P_{A,T} + P_{B,T}) - T\mu = \log \left( \exp \left( \sum_{t=1}^T \log x_{A,t} \right) + \exp \left( \sum_{t=1}^T \log x_{B,t} \right) \right) - T\mu. \quad [8]$$

Using the left hand inequality of Lemma 1 with  $m = 2$ ,

$$\max \left( \sum_{t=1}^T \log x_{A,t}, \sum_{t=1}^T \log x_{B,t} \right) - T\mu \leq \log(P_{A,T} + P_{B,T}) - T\mu, \quad [9]$$

Table S3. Simulated population growth rate ( $\sigma = 2.0$ )

| $\rho$ | -0.9   | -0.8   | -0.7   | -0.6   | -0.5   | -0.4   | -0.3   | -0.2   | -0.1   | 0.0    | 0.1    | 0.2    | 0.3    | 0.4    | 0.5    | 0.6    | 0.7    | 0.8    | 0.9    |
|--------|--------|--------|--------|--------|--------|--------|--------|--------|--------|--------|--------|--------|--------|--------|--------|--------|--------|--------|--------|
| 0.00   | 53.1%  | 51.9%  | 48.8%  | 46.9%  | 45.9%  | 42.1%  | 41.5%  | 38.8%  | 36.8%  | 34.0%  | 31.8%  | 31.1%  | 27.0%  | 23.7%  | 21.8%  | 18.7%  | 16.2%  | 11.1%  | 7.2%   |
| 0.02   | 57.0%  | 53.9%  | 52.8%  | 50.4%  | 46.9%  | 45.5%  | 44.2%  | 42.2%  | 39.1%  | 36.9%  | 34.7%  | 32.4%  | 28.0%  | 26.2%  | 25.0%  | 20.1%  | 16.0%  | 13.7%  | 8.8%   |
| 0.04   | 60.0%  | 57.2%  | 55.7%  | 53.2%  | 51.1%  | 50.4%  | 46.7%  | 44.4%  | 42.2%  | 39.9%  | 36.4%  | 35.3%  | 32.8%  | 28.3%  | 26.5%  | 22.8%  | 19.2%  | 14.8%  | 11.3%  |
| 0.06   | 63.9%  | 60.5%  | 58.6%  | 57.2%  | 52.8%  | 51.9%  | 51.3%  | 48.6%  | 45.2%  | 41.4%  | 39.9%  | 37.4%  | 34.7%  | 33.0%  | 28.8%  | 25.1%  | 22.3%  | 18.5%  | 14.6%  |
| 0.08   | 67.4%  | 63.6%  | 60.1%  | 58.7%  | 58.3%  | 55.2%  | 54.6%  | 51.6%  | 48.5%  | 45.8%  | 42.6%  | 40.7%  | 38.5%  | 34.2%  | 31.2%  | 27.1%  | 25.4%  | 21.4%  | 15.2%  |
| 0.10   | 69.7%  | 66.9%  | 64.7%  | 62.8%  | 60.8%  | 58.3%  | 56.0%  | 53.0%  | 52.2%  | 49.0%  | 45.9%  | 42.1%  | 40.4%  | 39.4%  | 35.5%  | 31.3%  | 27.0%  | 22.9%  | 17.1%  |
| 0.12   | 73.3%  | 71.3%  | 67.8%  | 66.2%  | 63.5%  | 60.9%  | 58.2%  | 55.8%  | 53.8%  | 52.4%  | 47.2%  | 46.0%  | 42.1%  | 40.2%  | 36.3%  | 31.7%  | 28.8%  | 25.4%  | 21.4%  |
| 0.14   | 77.0%  | 74.1%  | 71.9%  | 71.1%  | 65.2%  | 66.0%  | 61.1%  | 59.4%  | 56.4%  | 54.5%  | 53.2%  | 49.0%  | 46.9%  | 42.2%  | 40.0%  | 35.8%  | 31.8%  | 26.7%  | 22.1%  |
| 0.16   | 79.8%  | 77.4%  | 74.9%  | 72.7%  | 71.4%  | 68.0%  | 65.3%  | 63.4%  | 57.7%  | 58.1%  | 53.1%  | 51.9%  | 49.6%  | 43.5%  | 43.3%  | 37.4%  | 34.6%  | 31.2%  | 25.4%  |
| 0.18   | 82.7%  | 81.9%  | 79.0%  | 76.9%  | 73.9%  | 71.7%  | 67.9%  | 66.4%  | 63.1%  | 61.3%  | 58.4%  | 55.8%  | 51.8%  | 48.0%  | 45.5%  | 40.4%  | 38.1%  | 32.9%  | 28.4%  |
| 0.20   | 86.2%  | 84.9%  | 81.1%  | 79.0%  | 77.5%  | 76.0%  | 72.4%  | 69.9%  | 67.0%  | 64.0%  | 60.9%  | 59.2%  | 53.8%  | 51.2%  | 47.7%  | 44.8%  | 40.0%  | 35.8%  | 30.0%  |
| 0.22   | 90.7%  | 88.7%  | 85.4%  | 84.5%  | 81.6%  | 79.3%  | 75.3%  | 74.4%  | 70.6%  | 67.8%  | 64.2%  | 60.7%  | 58.4%  | 54.4%  | 51.6%  | 46.6%  | 43.6%  | 38.2%  | 33.8%  |
| 0.24   | 95.5%  | 93.2%  | 89.7%  | 86.4%  | 84.6%  | 81.2%  | 79.2%  | 74.9%  | 73.5%  | 71.1%  | 66.1%  | 64.7%  | 61.5%  | 57.9%  | 55.1%  | 50.6%  | 46.6%  | 40.5%  | 34.8%  |
| 0.26   | 99.3%  | 95.9%  | 93.7%  | 90.9%  | 88.1%  | 85.5%  | 83.4%  | 79.5%  | 77.1%  | 74.7%  | 69.6%  | 65.9%  | 65.3%  | 59.4%  | 56.5%  | 50.8%  | 50.0%  | 44.6%  | 38.0%  |
| 0.28   | 103.0% | 99.5%  | 98.7%  | 92.7%  | 93.4%  | 89.6%  | 88.2%  | 83.8%  | 80.9%  | 77.5%  | 74.0%  | 70.4%  | 68.5%  | 64.2%  | 59.3%  | 55.3%  | 50.1%  | 47.0%  | 43.3%  |
| 0.30   | 106.0% | 104.0% | 102.3% | 100.3% | 96.2%  | 94.5%  | 89.4%  | 88.8%  | 84.5%  | 82.0%  | 78.8%  | 74.3%  | 71.5%  | 66.9%  | 64.1%  | 59.5%  | 54.5%  | 49.6%  | 43.3%  |
| 0.32   | 111.5% | 109.1% | 106.9% | 102.8% | 98.6%  | 97.6%  | 94.8%  | 90.8%  | 87.4%  | 85.2%  | 82.4%  | 78.8%  | 74.6%  | 70.5%  | 66.9%  | 62.9%  | 57.1%  | 51.9%  | 47.8%  |
| 0.34   | 115.2% | 111.9% | 110.2% | 107.1% | 104.9% | 101.6% | 98.5%  | 95.4%  | 92.8%  | 88.7%  | 85.4%  | 83.1%  | 80.1%  | 74.3%  | 70.4%  | 66.4%  | 61.9%  | 54.8%  | 50.1%  |
| 0.36   | 120.9% | 118.3% | 114.3% | 110.9% | 108.0% | 106.3% | 100.1% | 98.6%  | 96.1%  | 92.8%  | 88.0%  | 85.0%  | 81.1%  | 77.5%  | 74.3%  | 68.7%  | 64.9%  | 59.2%  | 51.0%  |
| 0.38   | 125.1% | 122.0% | 118.7% | 114.9% | 113.4% | 109.5% | 107.5% | 103.3% | 99.3%  | 94.3%  | 94.5%  | 88.9%  | 84.8%  | 81.0%  | 80.1%  | 73.2%  | 66.2%  | 63.1%  | 56.1%  |
| 0.40   | 128.8% | 126.2% | 123.2% | 119.4% | 117.2% | 113.0% | 110.9% | 108.3% | 104.5% | 101.2% | 97.7%  | 93.8%  | 89.8%  | 85.1%  | 82.7%  | 78.1%  | 72.4%  | 67.5%  | 59.1%  |
| 0.42   | 133.7% | 131.7% | 126.9% | 123.1% | 121.9% | 119.2% | 114.6% | 110.0% | 109.7% | 104.1% | 100.3% | 95.6%  | 92.6%  | 89.0%  | 85.9%  | 79.4%  | 75.6%  | 70.2%  | 60.7%  |
| 0.44   | 137.7% | 135.4% | 132.7% | 127.7% | 126.6% | 122.1% | 121.3% | 114.9% | 112.1% | 107.8% | 104.9% | 99.8%  | 96.5%  | 92.2%  | 89.1%  | 84.8%  | 76.8%  | 72.1%  | 67.5%  |
| 0.46   | 142.1% | 140.6% | 137.7% | 133.6% | 130.1% | 125.8% | 124.3% | 117.5% | 118.0% | 111.2% | 107.9% | 104.4% | 102.1% | 96.4%  | 92.7%  | 87.3%  | 82.6%  | 76.3%  | 69.5%  |
| 0.48   | 147.8% | 144.3% | 140.5% | 136.7% | 136.5% | 130.5% | 127.6% | 124.0% | 121.6% | 116.5% | 113.2% | 110.1% | 104.2% | 100.0% | 97.0%  | 90.0%  | 84.9%  | 77.5%  | 72.2%  |
| 0.50   | 151.8% | 151.0% | 145.4% | 142.7% | 140.1% | 137.3% | 132.3% | 128.7% | 125.4% | 121.4% | 118.0% | 114.2% | 107.1% | 105.1% | 99.9%  | 94.7%  | 89.0%  | 83.2%  | 76.2%  |
| 0.52   | 158.1% | 154.4% | 150.7% | 146.5% | 144.8% | 143.2% | 135.4% | 133.3% | 130.7% | 125.1% | 122.4% | 117.5% | 112.9% | 110.6% | 103.3% | 98.2%  | 93.4%  | 87.3%  | 79.6%  |
| 0.54   | 162.1% | 160.6% | 157.1% | 153.9% | 150.9% | 147.1% | 142.5% | 137.8% | 134.9% | 130.3% | 125.7% | 121.4% | 118.5% | 111.5% | 111.0% | 102.6% | 96.8%  | 90.5%  | 83.6%  |
| 0.56   | 169.5% | 165.3% | 161.8% | 158.2% | 152.7% | 150.1% | 146.6% | 142.2% | 140.6% | 132.9% | 133.5% | 125.8% | 122.5% | 116.4% | 112.8% | 105.3% | 101.9% | 94.9%  | 87.3%  |
| 0.58   | 174.7% | 171.9% | 166.6% | 164.1% | 158.3% | 155.1% | 150.5% | 148.7% | 145.2% | 137.4% | 135.6% | 130.6% | 128.7% | 121.0% | 116.2% | 111.6% | 104.9% | 96.7%  | 89.2%  |
| 0.60   | 182.0% | 177.1% | 172.7% | 169.8% | 165.2% | 160.7% | 155.1% | 146.7% | 145.1% | 140.6% | 135.6% | 132.8% | 125.5% | 121.9% | 115.9% | 113.7% | 102.0% | 93.1%  |        |
| 0.62   | 186.0% | 183.0% | 178.7% | 173.3% | 172.2% | 165.3% | 161.6% | 159.0% | 153.4% | 147.7% | 142.4% | 140.4% | 134.3% | 129.4% | 125.4% | 122.1% | 114.2% | 107.7% | 96.3%  |
| 0.64   | 191.8% | 189.3% | 181.9% | 179.7% | 175.8% | 172.1% | 167.7% | 161.9% | 159.2% | 155.0% | 148.5% | 146.1% | 140.5% | 136.5% | 131.1% | 124.9% | 118.9% | 110.9% | 103.4% |
| 0.66   | 198.8% | 194.2% | 187.3% | 183.9% | 177.9% | 178.5% | 173.3% | 167.4% | 162.1% | 158.0% | 156.4% | 150.1% | 143.7% | 139.8% | 132.6% | 127.2% | 121.6% | 114.9% | 106.7% |
| 0.68   | 204.0% | 197.9% | 195.9% | 191.4% | 187.7% | 182.3% | 176.8% | 176.3% | 170.9% | 164.3% | 162.0% | 154.7% | 152.1% | 144.0% | 141.2% | 133.6% | 128.9% | 120.0% | 110.3% |
| 0.70   | 207.6% | 204.3% | 202.5% | 195.3% | 194.3% | 187.8% | 185.8% | 178.8% | 174.8% | 172.6% | 167.4% | 160.5% | 155.8% | 149.9% | 144.2% | 136.5% | 132.6% | 123.5% | 117.0% |
| 0.72   | 218.4% | 211.0% | 207.4% | 202.1% | 197.9% | 194.8% | 189.8% | 184.7% | 178.6% | 174.4% | 170.6% | 166.0% | 159.1% | 155.4% | 147.6% | 143.2% | 136.6% | 130.1% | 116.6% |
| 0.74   | 222.9% | 219.4% | 213.5% | 207.8% | 206.4% | 197.5% | 195.3% | 188.6% | 183.3% | 181.0% | 175.5% | 169.8% | 167.3% | 161.2% | 156.0% | 145.6% | 138.7% | 133.9% | 123.3% |
| 0.76   | 230.2% | 225.1% | 221.3% | 213.2% | 211.5% | 207.6% | 201.9% | 195.8% | 193.5% | 188.2% | 180.5% | 174.1% | 172.9% | 163.5% | 158.7% | 152.1% | 145.8% | 139.7% | 128.8% |
| 0.78   | 234.2% | 229.6% | 224.6% | 218.4% | 218.8% | 213.4% | 207.0% | 202.8% | 199.1% | 194.1% | 189.1% | 182.1% | 177.7% | 168.7% | 164.8% | 158.4% | 147.9% | 143.9% | 133.1% |
| 0.80   | 241.8% | 238.1% | 231.8% | 229.3% | 226.3% | 220.3% | 211.3% | 212.4% | 200.5% | 199.6% | 195.9% | 189.6% | 184.0% | 176.4% | 169.6% | 161.0% | 154.0% | 147.9% | 136.2% |
| 0.82   | 246.9% | 243.0% | 237.6% | 234.8% | 231.1% | 224.7% | 220.9% | 215.1% | 211.9% | 206.0% | 197.8% | 195.1% | 188.1% | 179.5% | 178.2% | 169.6% | 162.8% | 152.6% | 143.1% |
| 0.84   | 255.3% | 249.0% | 246.5% | 239.8% | 235.6% | 230.5% | 228.0% | 221.2% | 214.9% | 209.9% | 204.7% | 198.0% | 193.8% | 188.0% | 181.3% | 172.6% | 167.3% | 157.4% | 145.4% |
| 0.86   | 262.7% | 258.1% | 253.4% | 246.3% | 242.6% | 237.6% | 233.9% | 229.7% | 221.9% | 216.6% | 213.9% | 204.4% | 201.1% | 195.9% | 185.9% | 179.2% | 171.0% | 164.8% | 152.6% |
| 0.88   | 270.3% | 265.8% | 259.8% | 255.2% | 251.0% | 242.4% | 240.2% | 232.7% | 227.1% | 224.2% | 217.3% | 211.9% | 209.7% | 200.0% | 189.8% | 188.7% | 178.8% | 168.3% | 156.8% |
| 0.90   | 275.8% | 272.0% | 265.9% | 263.2% | 254.9% | 254.2% | 245.9% | 244.4% | 238.4% | 230.7% | 220.9% | 220.9% | 215.1% | 209.2% | 199.3% | 191.2% | 179.0% | 169.6% | 164.6% |
| 0.92   | 286.1% | 281.5% | 270.1% | 268.6% | 266.8% | 255.9% | 255.0% | 249.1% | 244.8% | 236.7% | 228.3% | 227.2% | 219.2% | 209.1% | 201.9% | 200.7% | 190.8% | 178.8% | 167.3% |
| 0.94   | 292.9% | 289.8% | 282.5% | 280.0% | 270.2% | 264.9% | 260.2% | 257.9% | 248.8% | 246.1% | 240.1% | 229.4% | 224.6% | 217.7% | 211.2% | 202.3% | 193.3% | 184.9% | 174.6% |
| 0.96   | 303.6% | 298.2% | 291.9% | 286.3% | 278.7% | 272.9% | 268.3% | 263.1% | 258.2% | 250.1% | 243.7% | 234.9% | 229.9% | 220.1% | 221.1% | 211.0% | 198.9% | 187.7% | 179.6% |
| 0.98   | 308.1% | 302.3% | 297.6% | 293.7% | 286.5% | 279.6% | 276.5% | 271.4% | 263.3% | 256.5% | 245.4% | 244.5% | 240.0% | 229.0% | 225.0% | 214.4% | 209.0% | 198.9% | 185.8% |
| 1.00   | 319.3% | 311.2% | 306.1% | 300.3% | 295.0% | 289.3% | 283.3% | 276.5% | 272.5% | 263.4% | 255.4% | 250.5% | 245.3% | 234.1% | 230.5% | 221.3% | 213.3% | 205.0% | 187.7% |

The number of offspring for both types follows a lognormal distribution with the stated  $\mu$  and  $\rho$ , and with  $\sigma = 2.0$ . Quantities shown represent population growth rate per generation after 10 generations, computed as  $e^{\frac{\log(P_{10}/P_0)}{10}}$ , where  $P_T = P_{A,T} + P_{B,T}$ .

118 SO

$$119 \max \left( \frac{\sum_{t=1}^T \log x_{A,t} - T\mu}{\sqrt{T}}, \frac{\sum_{t=1}^T \log x_{B,t} - T\mu}{\sqrt{T}} \right) \leq \frac{\log(P_{A,T} + P_{B,T}) - T\mu}{\sqrt{T}}. \quad [10]$$

120 Similarly, using the right hand inequality of Lemma 1 with  $m = 2$ ,

$$121 \log(P_{A,T} + P_{B,T}) - T\mu \leq \max \left( \sum_{t=1}^T \log x_{A,t}, \sum_{t=1}^T \log x_{B,t} \right) + \log(2) - T\mu, \quad [11]$$

122 and

$$123 \frac{\log(P_{A,T} + P_{B,T}) - T\mu}{\sqrt{T}} \leq \max \left( \frac{\sum_{t=1}^T \log x_{A,t} - T\mu}{\sqrt{T}}, \frac{\sum_{t=1}^T \log x_{B,t} - T\mu}{\sqrt{T}} \right) + \frac{\log(2)}{\sqrt{T}}. \quad [12]$$

124 The central limit theorem states that the joint vector  $\left( \frac{\sum_{t=1}^T \log x_{A,t} - T\mu}{\sqrt{T}}, \frac{\sum_{t=1}^T \log x_{B,t} - T\mu}{\sqrt{T}} \right)$  converges in distribution

125 to  $(N_A, N_B)$ , where  $N_A$  and  $N_B$  are normally distributed vector with means 0, variances  $\sigma_A^2$  and  $\sigma_B^2$ , and correlation  $\rho$ .

126 Since max is continuous, the continuous mapping theorem implies that  $\max \left( \frac{\sum_{t=1}^T \log x_{A,t} - T\mu}{\sqrt{T}}, \frac{\sum_{t=1}^T \log x_{B,t} - T\mu}{\sqrt{T}} \right)$

127 converges to  $\max(N_A, N_B)$ . Since  $\left| \frac{\log(P_{A,T} + P_{B,T}) - T\mu}{\sqrt{T}} - \max \left( \frac{\sum_{t=1}^T \log x_{A,t} - T\mu}{\sqrt{T}}, \frac{\sum_{t=1}^T \log x_{B,t} - T\mu}{\sqrt{T}} \right) \right|$  converges almost surely

128 to 0,  $\frac{\log(P_{A,T} + P_{B,T}) - T\mu}{\sqrt{T}}$  converges in distribution to  $\max(N_A, N_B)$ .  $\square$



**Table S4. Simulated population growth rate with idiosyncratic risk** ( $\mu_{\text{id}} = -1.0$ ,  $\sigma_{\text{id}} = 0.0$ )

| $\rho \backslash \mu$ | -0.9  | -0.7  | -0.5  | -0.3  | -0.1  | 0.1   | 0.3   | 0.5   | 0.7   | 0.9   |
|-----------------------|-------|-------|-------|-------|-------|-------|-------|-------|-------|-------|
| 0.00                  | 69.1% | 67.6% | 66.0% | 65.0% | 63.3% | 61.3% | 59.3% | 57.0% | 54.5% | 52.7% |
| 0.01                  | 69.5% | 69.2% | 67.0% | 65.9% | 63.6% | 62.5% | 59.6% | 57.7% | 56.5% | 53.0% |
| 0.02                  | 71.2% | 69.7% | 68.4% | 67.0% | 65.6% | 63.7% | 61.6% | 59.3% | 57.2% | 54.6% |
| 0.03                  | 72.3% | 71.7% | 69.4% | 67.6% | 65.9% | 64.5% | 63.0% | 60.3% | 58.2% | 55.1% |
| 0.04                  | 73.7% | 72.7% | 71.3% | 69.3% | 67.2% | 65.7% | 63.9% | 61.7% | 59.1% | 56.2% |
| 0.05                  | 75.3% | 74.0% | 72.1% | 70.5% | 69.5% | 66.6% | 65.1% | 62.5% | 60.4% | 57.8% |
| 0.06                  | 76.8% | 75.0% | 73.4% | 72.2% | 70.4% | 68.8% | 66.1% | 64.4% | 61.8% | 58.3% |
| 0.07                  | 77.5% | 76.9% | 75.0% | 73.4% | 71.9% | 68.9% | 66.8% | 65.3% | 62.8% | 59.1% |
| 0.08                  | 78.8% | 77.5% | 76.2% | 74.9% | 72.5% | 71.3% | 68.5% | 66.8% | 64.6% | 60.0% |
| 0.09                  | 80.1% | 79.0% | 77.1% | 76.3% | 74.0% | 72.8% | 70.2% | 68.4% | 65.2% | 61.8% |
| 0.10                  | 82.2% | 80.0% | 78.5% | 77.1% | 75.3% | 73.3% | 71.6% | 68.5% | 66.2% | 62.7% |
| 0.11                  | 83.4% | 81.6% | 79.4% | 78.6% | 75.9% | 75.5% | 72.4% | 70.3% | 67.8% | 63.4% |
| 0.12                  | 85.2% | 83.2% | 81.5% | 80.0% | 77.8% | 75.8% | 73.8% | 71.1% | 68.4% | 66.1% |
| 0.13                  | 85.8% | 84.8% | 82.7% | 81.1% | 79.5% | 77.6% | 74.5% | 72.7% | 70.5% | 67.6% |
| 0.14                  | 87.0% | 85.9% | 84.3% | 82.7% | 80.5% | 78.8% | 76.7% | 74.2% | 71.1% | 68.4% |
| 0.15                  | 89.0% | 87.2% | 85.8% | 83.5% | 82.2% | 79.9% | 77.6% | 75.6% | 72.9% | 68.7% |
| 0.16                  | 90.6% | 88.8% | 86.7% | 85.2% | 83.3% | 81.4% | 78.9% | 77.1% | 73.0% | 70.5% |
| 0.17                  | 92.3% | 90.1% | 88.4% | 86.5% | 84.3% | 82.9% | 80.3% | 78.7% | 75.3% | 71.2% |
| 0.18                  | 93.1% | 91.5% | 89.5% | 87.7% | 86.1% | 83.9% | 81.1% | 78.9% | 76.8% | 72.8% |
| 0.19                  | 94.5% | 92.8% | 91.1% | 89.3% | 87.9% | 85.3% | 82.7% | 80.9% | 77.6% | 74.0% |
| 0.20                  | 96.1% | 94.4% | 92.7% | 91.3% | 88.9% | 86.6% | 84.7% | 82.3% | 78.9% | 74.9% |

The systematic component of number of offspring for both types follows a lognormal distribution with the stated  $\mu$  and  $\rho$ , and with  $\sigma = 1.0$ . The idiosyncratic component follows a lognormal distribution with  $\mu_{\text{id}} = -1.0$  and  $\sigma_{\text{id}} = 0.0$ . Quantities shown represent population growth rate per generation after 10 generations, computed as  $e^{\mathbb{E}[\log(P_{10}/P_0)]/10}$ , where  $P_T = P_{A,T} + P_{B,T}$ .

*Proof of Proposition 1.*

$$\frac{\log((P_{A,T} + P_{B,T})/(\bar{P}_{A,T} + \bar{P}_{B,T}))}{T} = \left( \frac{\log(P_{A,T} + P_{B,T})}{T} - \frac{\log(\bar{P}_{A,T} + \bar{P}_{B,T})}{T} \right), \quad [13]$$

so by Theorem 1,

$$\frac{\log((P_{A,T} + P_{B,T})/(\bar{P}_{A,T} + \bar{P}_{B,T}))}{T} \rightarrow \max(\mu_A, \mu_B) - \max(\bar{\mu}_A, \bar{\mu}_B) \quad [14]$$

almost surely.  $\square$

*Proof of Proposition 2.* The central limit theorem implies that the joint vector

$$\left( \frac{\sum_{t=1}^T \log x_{A,t} - T\mu}{\sqrt{T}}, \frac{\sum_{t=1}^T \log x_{B,t} - T\mu}{\sqrt{T}}, \frac{\sum_{t=1}^T \log \bar{x}_{A,t} - T\mu}{\sqrt{T}}, \frac{\sum_{t=1}^T \log \bar{x}_{B,t} - T\mu}{\sqrt{T}} \right)$$

converges in distribution to

$$(N_A, N_B, \bar{N}_A, \bar{N}_B)$$

where  $(N_A, N_B, \bar{N}_A, \bar{N}_B)$  has the same correlation structure as  $(x_{A,t}, x_{B,t}, \bar{x}_{A,t}, \bar{x}_{B,t})$ . By the continuous mapping theorem,

$$\max \left( \frac{\sum_{t=1}^T \log x_{A,t} - T\mu}{\sqrt{T}}, \frac{\sum_{t=1}^T \log x_{B,t} - T\mu}{\sqrt{T}} \right) - \max \left( \frac{\sum_{t=1}^T \log \bar{x}_{A,t} - T\mu}{\sqrt{T}}, \frac{\sum_{t=1}^T \log \bar{x}_{B,t} - T\mu}{\sqrt{T}} \right)$$

converges in distribution to

$$\max(N_A, N_B) - \max(\bar{N}_A, \bar{N}_B)$$

As in the proof of Theorem 2, using Lemma 1,

$$\left| \frac{\log(P_{A,T} + P_{B,T}) - T\mu}{\sqrt{T}} - \max \left( \frac{\sum_{t=1}^T \log x_{A,t} - T\mu}{\sqrt{T}}, \frac{\sum_{t=1}^T \log x_{B,t} - T\mu}{\sqrt{T}} \right) \right| \rightarrow^{\text{a.s.}} 0, \quad [15]$$

and

$$\left| \frac{\log(\bar{P}_{A,T} + \bar{P}_{B,T}) - T\mu}{\sqrt{T}} - \max \left( \frac{\sum_{t=1}^T \log \bar{x}_{A,t} - T\mu}{\sqrt{T}}, \frac{\sum_{t=1}^T \log \bar{x}_{B,t} - T\mu}{\sqrt{T}} \right) \right| \rightarrow^{\text{a.s.}} 0, \quad [16]$$

**Table S5. Simulated population growth rate with idiosyncratic risk ( $\mu_{\text{id}} = 0.0$ ,  $\sigma_{\text{id}} = 0.0$ )**

| $\mu \backslash \rho$ | -0.9   | -0.7   | -0.5   | -0.3   | -0.1   | 0.1    | 0.3    | 0.5    | 0.7    | 0.9    |
|-----------------------|--------|--------|--------|--------|--------|--------|--------|--------|--------|--------|
| 0.00                  | 140.9% | 139.2% | 138.4% | 137.0% | 135.9% | 134.2% | 131.9% | 130.5% | 127.7% | 126.2% |
| 0.01                  | 142.4% | 141.3% | 139.8% | 138.4% | 137.5% | 135.5% | 133.6% | 131.6% | 128.9% | 126.7% |
| 0.02                  | 143.8% | 142.6% | 141.4% | 139.7% | 139.0% | 136.4% | 134.5% | 133.4% | 130.7% | 127.6% |
| 0.03                  | 145.3% | 143.8% | 142.8% | 140.9% | 139.5% | 137.5% | 135.5% | 134.0% | 131.3% | 128.7% |
| 0.04                  | 146.0% | 145.3% | 143.5% | 142.5% | 140.9% | 138.4% | 136.8% | 135.5% | 132.6% | 130.5% |
| 0.05                  | 147.8% | 146.8% | 145.3% | 143.7% | 142.4% | 140.0% | 138.4% | 136.0% | 133.9% | 131.9% |
| 0.06                  | 148.8% | 147.2% | 147.0% | 144.4% | 143.4% | 141.6% | 139.5% | 138.0% | 135.1% | 132.7% |
| 0.07                  | 150.5% | 149.3% | 148.1% | 146.1% | 145.0% | 143.2% | 140.6% | 138.3% | 136.4% | 134.2% |
| 0.08                  | 151.9% | 150.8% | 149.7% | 147.6% | 146.2% | 144.2% | 142.3% | 139.8% | 137.4% | 135.4% |
| 0.09                  | 153.5% | 151.8% | 150.2% | 149.4% | 147.5% | 145.3% | 143.6% | 141.4% | 139.3% | 135.7% |
| 0.10                  | 154.8% | 153.4% | 152.4% | 150.7% | 148.3% | 146.9% | 145.1% | 142.3% | 140.0% | 137.7% |
| 0.11                  | 155.9% | 154.9% | 153.3% | 151.8% | 150.2% | 148.4% | 146.1% | 144.6% | 141.7% | 139.3% |
| 0.12                  | 157.6% | 156.8% | 154.9% | 153.7% | 151.2% | 149.7% | 147.8% | 144.6% | 142.2% | 139.0% |
| 0.13                  | 159.0% | 157.7% | 155.9% | 155.2% | 152.4% | 151.2% | 149.8% | 147.1% | 145.0% | 141.7% |
| 0.14                  | 160.6% | 159.1% | 157.3% | 156.0% | 154.3% | 152.2% | 150.5% | 148.1% | 145.6% | 142.4% |
| 0.15                  | 161.7% | 160.7% | 158.9% | 157.8% | 155.5% | 153.5% | 152.2% | 149.6% | 146.7% | 144.7% |
| 0.16                  | 163.7% | 162.6% | 160.8% | 158.5% | 157.5% | 154.8% | 154.1% | 151.7% | 147.8% | 145.0% |
| 0.17                  | 164.8% | 164.2% | 162.4% | 160.7% | 158.8% | 156.3% | 154.2% | 151.8% | 149.9% | 146.2% |
| 0.18                  | 166.3% | 165.0% | 164.1% | 162.4% | 160.6% | 158.3% | 155.9% | 153.6% | 151.3% | 147.5% |
| 0.19                  | 168.6% | 166.8% | 165.5% | 163.0% | 161.3% | 159.7% | 157.1% | 155.6% | 152.6% | 148.8% |
| 0.20                  | 170.1% | 168.3% | 166.6% | 164.3% | 163.2% | 161.2% | 158.8% | 155.9% | 153.2% | 150.3% |

The systematic component of number of offspring for both types follows a lognormal distribution with the stated  $\mu$  and  $\rho$ , and with  $\sigma = 1.0$ . The idiosyncratic component follows a lognormal distribution with  $\mu_{\text{id}} = 0.0$  and  $\sigma_{\text{id}} = 0.0$ . Quantities shown represent population growth rate per generation after 10 generations, computed as  $e^{\mathbb{E}[\log(P_{10}/P_0)]/10}$ , where  $P_T = P_{A,T} + P_{B,T}$ .

145 If  $X_n \rightarrow Z$  in distribution and  $|X_n - Y_n| \rightarrow 0$  almost surely, then  $Y_n \rightarrow Z$  in distribution. So

$$146 \frac{\log(P_{A,T} + P_{B,T}) - T\mu}{\sqrt{T}} - \frac{\log(\bar{P}_{A,T} + \bar{P}_{B,T}) - T\mu}{\sqrt{T}} \rightarrow^d \max(N_A, N_B) - \max(\bar{N}_A, \bar{N}_B), \quad [17]$$

147 and rearranging the left hand side,

$$148 \frac{\log((P_{A,T} + P_{B,T})/(\bar{P}_{A,T} + \bar{P}_{B,T}))}{\sqrt{T}} \rightarrow^d \max(N_A, N_B) - \max(\bar{N}_A, \bar{N}_B). \quad [18]$$

149 By the continuous mapping theorem,

$$150 ((P_{A,T} + P_{B,T})/(\bar{P}_{A,T} + \bar{P}_{B,T}))^{1/\sqrt{T}} \rightarrow^d \exp(\max(N_A, N_B) - \max(\bar{N}_A, \bar{N}_B)). \quad [19]$$

151 Passing to a probability space where the above convergence happens almost surely and using Fatou's lemma,

$$152 \liminf_{T \rightarrow \infty} \mathbb{E} \left[ \left( (P_{A,T} + P_{B,T})/(\bar{P}_{A,T} + \bar{P}_{B,T}) \right)^{1/\sqrt{T}} \right] \geq \mathbb{E} \left[ \exp(\max(N_A, N_B) - \max(\bar{N}_A, \bar{N}_B)) \right]. \quad [20]$$

153 Since  $\rho < \bar{\rho}$ ,

$$154 \mathbb{E} \left[ \max(N_A, N_B) - \max(\bar{N}_A, \bar{N}_B) \right] > 0. \quad [21]$$

155 By Jensen's inequality,

$$156 \mathbb{E} \left[ \exp(\max(N_A, N_B) - \max(\bar{N}_A, \bar{N}_B)) \right] \geq \exp(\mathbb{E}[\max(N_A, N_B) - \max(\bar{N}_A, \bar{N}_B)]) \quad [22]$$

157 where  $c > 1$ . Also by Jensen's inequality,

$$158 \mathbb{E} \left[ (P_{A,T} + P_{B,T})/(\bar{P}_{A,T} + \bar{P}_{B,T}) \right]^{1/\sqrt{T}} \geq \mathbb{E} \left[ \left( (P_{A,T} + P_{B,T})/(\bar{P}_{A,T} + \bar{P}_{B,T}) \right)^{1/\sqrt{T}} \right], \quad [23]$$

159 SO

$$160 \liminf_{T \rightarrow \infty} \mathbb{E} \left[ (P_{A,T} + P_{B,T})/(\bar{P}_{A,T} + \bar{P}_{B,T}) \right]^{1/\sqrt{T}} \geq \exp(\mathbb{E}[\max(N_A, N_B) - \max(\bar{N}_A, \bar{N}_B)]). \quad [24]$$

161 Taking the log of both sides, we have the desired result.  $\square$

**Table S6. Simulated population growth rate with idiosyncratic risk ( $\mu_{id} = -1.0, \sigma_{id} = \sqrt{2}$ )**

| $\rho$<br>$\mu$ | -0.9   | -0.7   | -0.5   | -0.3   | -0.1   | 0.1    | 0.3    | 0.5    | 0.7    | 0.9    |
|-----------------|--------|--------|--------|--------|--------|--------|--------|--------|--------|--------|
| 0.00            | 131.7% | 129.7% | 128.2% | 127.3% | 125.5% | 123.1% | 121.6% | 118.4% | 118.0% | 114.4% |
| 0.01            | 132.9% | 131.5% | 129.5% | 127.7% | 126.8% | 125.0% | 123.7% | 121.3% | 118.6% | 116.1% |
| 0.02            | 133.8% | 133.5% | 131.3% | 129.3% | 127.6% | 125.8% | 124.5% | 122.3% | 119.7% | 117.9% |
| 0.03            | 135.5% | 134.2% | 132.5% | 132.1% | 128.3% | 127.4% | 125.6% | 122.9% | 121.1% | 117.9% |
| 0.04            | 137.1% | 135.8% | 134.1% | 132.4% | 131.1% | 129.2% | 127.2% | 124.9% | 122.6% | 119.0% |
| 0.05            | 138.6% | 136.5% | 135.6% | 133.3% | 132.4% | 130.2% | 128.1% | 125.8% | 123.3% | 121.6% |
| 0.06            | 139.8% | 138.6% | 137.5% | 135.1% | 133.1% | 131.3% | 130.3% | 127.0% | 125.6% | 121.6% |
| 0.07            | 141.4% | 139.8% | 138.1% | 137.1% | 134.9% | 133.0% | 131.8% | 129.0% | 126.2% | 123.4% |
| 0.08            | 142.7% | 141.7% | 139.4% | 138.0% | 136.4% | 134.5% | 131.7% | 131.1% | 127.6% | 125.0% |
| 0.09            | 143.8% | 143.0% | 141.5% | 139.4% | 137.8% | 135.9% | 133.4% | 131.7% | 129.1% | 126.1% |
| 0.10            | 146.1% | 143.9% | 142.4% | 141.5% | 139.0% | 137.7% | 134.7% | 133.2% | 130.3% | 128.2% |
| 0.11            | 147.9% | 146.2% | 143.7% | 142.9% | 140.5% | 138.3% | 136.3% | 134.7% | 132.3% | 128.0% |
| 0.12            | 149.0% | 147.8% | 145.6% | 144.2% | 141.4% | 140.1% | 137.3% | 135.6% | 132.6% | 130.4% |
| 0.13            | 150.1% | 148.3% | 146.8% | 145.4% | 143.2% | 141.9% | 139.1% | 137.0% | 134.1% | 131.4% |
| 0.14            | 151.9% | 150.3% | 148.8% | 147.3% | 144.5% | 143.0% | 141.5% | 138.5% | 136.3% | 133.0% |
| 0.15            | 153.6% | 152.1% | 150.2% | 148.3% | 146.2% | 145.6% | 142.2% | 139.4% | 137.0% | 133.8% |
| 0.16            | 154.8% | 153.3% | 151.5% | 149.9% | 147.8% | 146.1% | 144.0% | 141.9% | 138.2% | 135.8% |
| 0.17            | 156.3% | 155.2% | 152.9% | 151.4% | 149.3% | 147.5% | 145.4% | 142.4% | 140.3% | 136.3% |
| 0.18            | 157.7% | 156.3% | 154.8% | 152.5% | 151.0% | 148.5% | 146.4% | 144.9% | 141.0% | 138.1% |
| 0.19            | 159.6% | 158.4% | 156.2% | 154.7% | 152.5% | 149.9% | 148.0% | 145.4% | 143.1% | 139.6% |
| 0.20            | 161.1% | 159.7% | 157.7% | 154.8% | 154.2% | 152.3% | 149.4% | 146.4% | 143.5% | 141.4% |

The systematic component of number of offspring for both types follows a lognormal distribution with the stated  $\mu$  and  $\rho$ , and with  $\sigma = 1.0$ . The idiosyncratic component follows a lognormal distribution with  $\mu_{id} = -1.0$  and  $\sigma_{id} = \sqrt{2}$ . Quantities shown represent population growth rate per generation after 10 generations, computed as  $e^{\mathbb{E}[\log(P_{10}/P_0)]/10}$ , where  $P_T = P_{A,T} + P_{B,T}$ .

**Table S7. Simulated density-dependent population growth rate ( $r = 1.4$ )**

| $\rho$<br>$K$ | -0.9  | -0.7  | -0.5  | -0.3  | -0.1  | 0.1   | 0.3   | 0.5   | 0.7   | 0.9   |
|---------------|-------|-------|-------|-------|-------|-------|-------|-------|-------|-------|
| 5.0           | 4.6%  | 4.3%  | 4.2%  | 4.1%  | 3.8%  | 3.6%  | 3.4%  | 3.0%  | 2.8%  | 2.1%  |
| 10.0          | 12.0% | 11.7% | 11.6% | 11.5% | 11.3% | 11.0% | 10.7% | 10.3% | 9.8%  | 9.4%  |
| 20.0          | 20.0% | 19.7% | 19.6% | 19.5% | 19.2% | 19.0% | 18.5% | 18.3% | 17.9% | 17.4% |
| 40.0          | 28.5% | 28.5% | 28.2% | 28.0% | 27.6% | 27.3% | 27.0% | 26.8% | 26.2% | 25.4% |
| 80.0          | 38.0% | 37.5% | 37.4% | 37.2% | 37.0% | 36.5% | 36.3% | 35.7% | 35.1% | 34.5% |

The number of offspring for both types follows Eq. (25) and Eq. (26) from the main article with the stated  $K$  and  $\rho$ , and with  $r = 1.4, s = 1.0$  and  $L = K$ . Quantities shown represent population growth rate per generation after 10 generations, computed as  $e^{\mathbb{E}[\log(P_{10}/P_0)]/10}$ , where

$$P_T = P_{A,T} + P_{B,T}.$$

162 *Proof of Theorem 3.* We have that

$$163 \frac{\log(P_{nT_0})}{nT_0} = \frac{\sum_{i=1}^n \log P_{iT_0} - \log P_{(i-1)T_0}}{nT_0} \quad [25]$$

164 Since

$$165 \log P_{iT_0} - \log P_{(i-1)T_0} = \log \left( \frac{1}{2} \prod_{t=(i-1)T_0+1}^{iT_0} x_{A,t} + \frac{1}{2} \prod_{t=(i-1)T_0+1}^{iT_0} x_{B,t} \right), \quad [26]$$

166  $\log P_{iT_0} - \log P_{(i-1)T_0}$  is IID over  $i$ , and the strong law of large numbers gives the result.  $\square$

167 *Proof of Theorem 4.* Using Lemma 1 with  $m = 2$ ,

$$168 \max(\log P_{A,T}, \log P_{B,T}) \leq \log(P_{A,T} + P_{B,T}) \leq \max(\log P_{A,T}, \log P_{B,T}) + \log(2). \quad [27]$$

169 Therefore, if we show separately that  $\frac{\log P_{A,T}}{T}$  converges almost surely to

$$170 \mathbb{E}[\log(\mathbb{E}[\bar{x}_{A,i,t}] + x_{A,t})],$$

171 and  $\frac{\log P_{B,T}}{T}$  converges almost surely to

$$172 \mathbb{E}[\log(\mathbb{E}[\bar{x}_{B,i,t}] + x_{B,t})],$$

**Table S8. Simulated density-dependent population growth rate ( $r = 1.5$ )**

| $K \backslash \rho$ | -0.9  | -0.7  | -0.5  | -0.3  | -0.1  | 0.1   | 0.3   | 0.5   | 0.7   | 0.9   |
|---------------------|-------|-------|-------|-------|-------|-------|-------|-------|-------|-------|
| 5.0                 | 4.9%  | 4.7%  | 4.5%  | 4.4%  | 4.2%  | 3.9%  | 3.8%  | 3.5%  | 3.2%  | 2.8%  |
| 10.0                | 12.3% | 12.1% | 12.1% | 11.8% | 11.8% | 11.5% | 11.2% | 10.8% | 10.7% | 10.2% |
| 20.0                | 20.5% | 20.2% | 20.2% | 20.0% | 19.7% | 19.5% | 19.3% | 18.8% | 18.5% | 18.2% |
| 40.0                | 29.1% | 28.9% | 28.7% | 28.4% | 28.3% | 28.1% | 27.6% | 27.5% | 27.2% | 26.4% |
| 80.0                | 38.6% | 38.1% | 37.9% | 37.8% | 37.5% | 37.4% | 37.1% | 36.8% | 36.1% | 35.4% |

The number of offspring for both types follows Eq. (25) and Eq. (26) from the main article with the stated  $K$  and  $\rho$ , and with  $r = 1.5$ ,  $s = 1.0$  and  $L = K$ . Quantities shown represent population growth rate per generation after 10 generations, computed as  $e^{\mathbb{E}[\log(P_{10}/P_0)]/10}$ , where

$$P_T = P_{A,T} + P_{B,T}.$$

then the result is proved. We will show the claim for  $\frac{\log P_{A,T}}{T}$ , and the claim for  $\frac{\log P_{B,T}}{T}$  follows by an identical argument replacing  $A$  with  $B$ .

First, decompose

$$\frac{\log P_{A,T}}{T} = \frac{\log P_{A,0} + \log \frac{P_{A,1}}{P_{A,0}} + \dots + \log \frac{P_{A,T}}{P_{A,T-1}}}{T}. \quad [28]$$

Since

$$P_{A,T} = \sum_{i=1}^{P_{A,T-1}} x_{A,T} + \bar{x}_{A,i,T}, \quad [29]$$

$\log \frac{P_{A,T}}{P_{A,T-1}}$  can be written as

$$\log \frac{P_{A,T}}{P_{A,T-1}} = \log \left( x_{A,T} + \frac{\sum_{i=1}^{P_{A,T-1}} \bar{x}_{A,i,T}}{P_{A,T-1}} \right). \quad [30]$$

Since  $\mathbb{E}[\log(x_{A,t})] > 0$ ,  $P_{A,T} \rightarrow \infty$  almost surely. Using the strong law of large numbers, and since  $x_{A,t}$  is bounded,

$$\left| \log \left( x_{A,T} + \frac{\sum_{i=1}^{P_{A,T-1}} \bar{x}_{A,i,T}}{P_{A,T-1}} \right) - \log \left( x_{A,T} + \mathbb{E}[\log(\bar{x}_{A,i,t})] \right) \right| \xrightarrow{\text{a.s.}} 0. \quad [31]$$

Using the strong law of large numbers once more in Eq. (28), the claim is proved.  $\square$

*Proof of Theorem 5.* We will show separately that  $\frac{\log P_{2,T}}{T}$  converges almost surely to

$$\mathbb{E} \left[ \log \left( \frac{1}{2} x_{A,2,T} + \frac{1}{2} x_{B,2,T} \right) \right]$$

and that  $\frac{\log P_{1,T}}{T}$  converges almost surely to

$$\mathbb{E} \left[ \log \left( \frac{1}{2} x_{A,1,T} + \frac{1}{2} x_{B,1,T} \right) \right].$$

First, observe that

$$\frac{\log P_{2,T}}{T} = \frac{\log P_{2,0} + \log \frac{P_{2,1}}{P_{2,0}} + \dots + \log \frac{P_{2,T}}{P_{2,T-1}}}{T}. \quad [32]$$

Since

$$P_{2,T} = \sum_{i=1}^{P_{2,T-1}} \mathbf{1}_{\{q_{2,i,T-1}=A2\}} x_{A,2,T} + \mathbf{1}_{\{q_{2,i,T-1}=B2\}} x_{B,2,T}, \quad [33]$$

$P_{2,T} \xrightarrow{\text{a.s.}} \infty$  almost surely (implicit in the assumption of the law of large numbers for random matching), and  $x_{A,2,t}$  and  $x_{B,2,t}$  are bounded, by the strong law of large numbers,

$$\left| \log \left( \frac{P_{2,T}}{P_{2,T-1}} \right) - \log \left( \frac{1}{2} x_{A,2,T} + \frac{1}{2} x_{B,2,T} \right) \right| \xrightarrow{\text{a.s.}} 0. \quad [34]$$

Again by the strong law of large numbers, as  $T$  increases without bound,

$$\frac{\log P_{2,0} + \log \frac{P_{2,1}}{P_{2,0}} + \dots + \log \frac{P_{2,T}}{P_{2,T-1}}}{T} \xrightarrow{\text{a.s.}} \mathbb{E} \left[ \log \left( \frac{1}{2} x_{A,2,T} + \frac{1}{2} x_{B,2,T} \right) \right], \quad [35]$$

197 and hence as  $T$  increases without bound,

$$198 \quad \frac{\log P_{2,T}}{T} \xrightarrow{\text{a.s.}} \mathbb{E} \left[ \log \left( \frac{1}{2} x_{A,2,T} + \frac{1}{2} x_{B,2,T} \right) \right]. \quad [36]$$

199 Similarly,

$$200 \quad \frac{\log P_{1,T}}{T} = \frac{\log P_{1,0} + \log \frac{P_{1,1}}{P_{1,0}} + \dots + \log \frac{P_{1,T}}{P_{1,T-1}}}{T}. \quad [37]$$

201 From the relation

$$202 \quad P_{1,T} = \sum_{i=1}^{P_{1,T-1}} \mathbf{1}_{\{q_{1,i,T-1}=A1\}} x_{A,1,T} + \mathbf{1}_{\{q_{1,i,T-1}=B1\}} x_{B,1,T} + \mathbf{1}_{\{q_{1,i,T-1}=A2\}} x_{A,2,T} + \mathbf{1}_{\{q_{1,i,T-1}=B2\}} x_{B,2,T}, \quad [38]$$

we can write

$$\begin{aligned} P_{1,T} &= \left( \sum_{i=1}^{P_{1,T-1}} \mathbf{1}_{\{q_{1,i,T-1}=A1\}} + \mathbf{1}_{\{q_{1,i,T-1}=B1\}} \right) \left( \frac{1}{2} x_{A,1,T} + \frac{1}{2} x_{B,1,T} \right) \\ &\quad + \left( \sum_{i=1}^{P_{1,T-1}} \mathbf{1}_{\{q_{1,i,T-1}=A2\}} + \mathbf{1}_{\{q_{1,i,T-1}=B2\}} \right) \left( \frac{\mathbf{1}_{\{q_{1,i,T-1}=A2\}}}{\sum_{i=1}^{P_{1,T-1}} \mathbf{1}_{\{q_{1,i,T-1}=A2\}} + \mathbf{1}_{\{q_{1,i,T-1}=B2\}}} x_{A,2,T} \right. \\ &\quad \left. + \frac{\mathbf{1}_{\{q_{1,i,T-1}=B2\}}}{\sum_{i=1}^{P_{1,T-1}} \mathbf{1}_{\{q_{1,i,T-1}=A2\}} + \mathbf{1}_{\{q_{1,i,T-1}=B2\}}} x_{B,2,T} \right) \end{aligned} \quad [39]$$

203 Let  $n_{k,T-1}$  be the number of type 1 individuals matched with type  $k$  for  $k = 1, 2$  in generation  $T - 1$ :

$$204 \quad n_{1,T-1} = \sum_{i=1}^{P_{1,T-1}} \mathbf{1}_{\{q_{1,i,T-1}=A1\}} + \mathbf{1}_{\{q_{1,i,T-1}=B1\}}, \quad n_{2,T-1} = \sum_{i=1}^{P_{1,T-1}} \mathbf{1}_{\{q_{1,i,T-1}=A2\}} + \mathbf{1}_{\{q_{1,i,T-1}=B2\}}. \quad [40]$$

205 By the assumption of the law of large numbers for random matching, and since  $x_{j,k,t}$  and  $n_{k,t-1}/P_{1,t-1}$  are bounded for  
206  $j = A, B$  and  $k = 1, 2$ , by the strong law of large numbers,

$$207 \quad \left| \log \left( \frac{P_{1,T}}{P_{1,T-1}} \right) - \log \left( \frac{n_{1,T-1}}{P_{1,T-1}} \left( \frac{1}{2} x_{A,1,T} + \frac{1}{2} x_{B,1,T} \right) + \frac{n_{2,T-1}}{P_{1,T-1}} \left( \frac{1}{2} x_{A,2,T} + \frac{1}{2} x_{B,2,T} \right) \right) \right| \xrightarrow{\text{a.s.}} 0 \quad [41]$$

208 Fix an outcome  $\omega$ . Consider any subsequence of the sequence  $\frac{\log P_{1,T}(\omega)}{T}$ . From the decomposition Eq. (37), the fact that  
209  $\frac{n_{1,T-1}}{P_{1,T-1}}$  and  $\frac{n_{2,T-1}}{P_{1,T-1}}$  are bounded, and the strong law of large numbers, there exists a further subsequence such that

$$210 \quad \frac{\log P_{1,T}(\omega)}{T} \xrightarrow{\text{a.s.}} \mathbb{E} \left[ \log \left( p \left( \frac{1}{2} x_{A,1,T} + \frac{1}{2} x_{B,1,T} \right) + (1-p) \left( \frac{1}{2} x_{A,2,T} + \frac{1}{2} x_{B,2,T} \right) \right) \right] \quad [42]$$

211 for some  $p$ . If  $p = 0$ , it would imply that  $P_{1,T}$  and  $P_{2,T}$  grow at the same rates, which would make it impossible for  $p$ , a  
212 subsequential limit of proportions of type 1 individuals matched to type 1, to be 0. Similarly, if  $0 < p < 1$ , by Jensen's  
213 inequality,  $P_{1,T}$  would grow exponentially faster than  $P_{2,T}$ , making it impossible that  $p < 1$ . Thus the only possibility is that  
214  $p = 1$ . Therefore, any subsequence of  $\frac{\log P_{1,T}(\omega)}{T}$  has a further subsequence converging to  $\mathbb{E} \left[ \log \left( \frac{1}{2} x_{A,1,T} + \frac{1}{2} x_{B,1,T} \right) \right]$ , proving  
215 that  $\frac{\log P_{1,T}}{T}$  converges to  $\mathbb{E} \left[ \log \left( \frac{1}{2} x_{A,1,T} + \frac{1}{2} x_{B,1,T} \right) \right]$  almost surely. □

216
